1           **A Universal Bacteriophage T4 Nanoparticle Platform to**  
2           **Design Multiplex SARS-CoV-2 Vaccine Candidates by**  
3           **CRISPR Engineering**

4           **Jingen Zhu<sup>1</sup>, Neeti Ananthaswamy<sup>1</sup>, Swati Jain<sup>1</sup>, Himanshu Batra<sup>1</sup>, Wei-Chun**  
5           **Tang<sup>1</sup>, Douglass A. Lewry<sup>2</sup>, Michael L. Richards<sup>2</sup>, Sunil A. David<sup>2</sup>, Paul B. Kilgore<sup>3</sup>,**  
6           **Jian Sha<sup>3</sup>, Aleksandra Drelich<sup>3</sup>, Chien-Te K. Tseng<sup>3-5\*</sup>, Ashok K. Chopra<sup>3-5\*</sup>, and**  
7           **Venigalla B. Rao<sup>1\*</sup>**

8  
9           <sup>1</sup>Department of Biology, The Catholic University of America, Washington, DC 20064,  
10           USA.

11           <sup>2</sup>Virovax LLC, Lawrence, KS 66047, USA.

12           <sup>3</sup>Department of Microbiology and Immunology, <sup>4</sup>Center for Biodefense and Emerging  
13           Infectious Diseases, and <sup>5</sup>Sealy Institute for Vaccine Sciences, University of Texas  
14           Medical Branch, Galveston, TX 77555, USA.

15           \*Correspondence: [rao@cua.edu](mailto:rao@cua.edu); [sktseng@utmb.edu](mailto:sktseng@utmb.edu); or [achopra@utmb.edu](mailto:achopra@utmb.edu)

16  
17  
18  
19  
20  
21  
22

23 **Abstract**

24 A “universal” vaccine design platform that can rapidly generate multiplex vaccine candidates is  
25 critically needed to control future pandemics. Here, using SARS-CoV-2 pandemic virus as a  
26 model, we have developed such a platform by CRISPR engineering of bacteriophage T4. A  
27 pipeline of vaccine candidates were engineered by incorporating various viral components into  
28 appropriate compartments of phage nanoparticle structure. These include: expressible spike  
29 genes in genome, spike and envelope epitopes as surface decorations, and nucleocapsid  
30 proteins in packaged core. Phage decorated with spike trimers is found to be the most potent  
31 vaccine candidate in mouse and rabbit models. Without any adjuvant, this vaccine stimulated  
32 robust immune responses, both T<sub>H</sub>1 and T<sub>H</sub>2 IgG subclasses, blocked virus-receptor interactions,  
33 neutralized viral infection, and conferred complete protection against viral challenge. This new  
34 type of nanovaccine design framework might allow rapid deployment of effective phage-based  
35 vaccines against any emerging pathogen in the future.

36

37

38

39

40

41

42

43

44

## 45 Introduction

46 Rapid discovery of safe and effective vaccines against emerging and pandemic pathogens  
47 such as the novel coronavirus SARS-CoV-2<sup>1, 2</sup> requires a “universal” vaccine design platform that  
48 can be adapted to any infectious agent<sup>3, 4</sup>. It should allow incorporation of diverse targets, DNAs,  
49 and proteins (multicomponent), full-length proteins as well as peptides and domains, in various  
50 combinations (multivalent). Such a multiplex platform would not only compress the timeline for  
51 vaccine discovery but also offers critical choices for selecting the most effective vaccine  
52 candidate(s) without going through iterative design cycles<sup>4-6</sup>.

53 Numerous SARS-CoV-2 vaccine candidates have been developed at record-breaking  
54 pace to quell this devastating pandemic and many are in clinical trials<sup>5, 7-11</sup>. Two of these, both  
55 mRNA based, have been approved by FDA for emergency use authorization. However, innovative  
56 platforms are still desperately needed because future pathogens might be more complex and their  
57 vaccine targets may not be as well-defined<sup>3, 4, 11</sup>. A drawback of the current platforms is that they  
58 are largely limited to a single vaccine target. They also lack sufficient engineering flexibility to  
59 generate multiplex vaccines, require strong chemical adjuvants to boost immune responses, and  
60 may not be accessible to resource-poor countries<sup>4-6, 12</sup>. Here, we present a “universal”  
61 nanovaccine platform by CRISPR engineering of bacteriophage (phage) T4 that can rapidly  
62 generate multiplex vaccine candidates against any emerging pathogen during epidemic or  
63 pandemic situations.

64 Tailed bacteriophages such as T4 are the most abundant and widely distributed organisms  
65 on Earth. T4 belongs to *myoviridae* family, infects *Escherichia coli*, and has served as an  
66 extraordinary model organism in molecular biology and biotechnology<sup>13</sup>. It consists of a 1200 Å  
67 long and 860 Å wide prolate head (or capsid) that encapsidates ~170 kb linear DNA genome, and  
68 a ~1400 Å long contractile tail with six long tail fibers emanating from a baseplate present at the  
69 tip of the tail<sup>14</sup> (Figure 1). The head, the principal component for vaccine design, is assembled

70 with 155 hexameric capsomers of the major capsid protein gp23\* (“\*” represents cleaved mature  
71 form), 11 pentamers of gp24\* at eleven of twelve vertices, and 1 dodecameric portal protein gp20  
72 at the unique twelfth vertex<sup>15, 16</sup> (Figure 1g).

73 The T4 capsid is coated with two nonessential proteins; Soc (small outer capsid protein)  
74 (9.1 kDa; 870 copies per capsid) and Hoc (highly antigenic outer capsid protein) (40.4 kDa; 155  
75 copies per capsid)<sup>16, 17</sup> (Figure 1g). Soc is a trimer, bound to quasi three-fold axes, and acts as a  
76 “molecular clamp” by clasping adjacent capsomers<sup>18</sup>. Hoc is a 170 Å-long fiber containing a string  
77 of four Ig-like domains with its N-terminal domain exposed at the tip of the fiber<sup>19</sup>. Soc reinforces  
78 an already stable T4 capsid while Hoc helps phage to adhere to host surfaces<sup>20</sup>.

79 The above constitutes an ideal architecture to develop a universal vaccine design template.  
80 Further, our four decades of genetic, biochemical, and structural studies on phage T4 including  
81 the recently developed CRISPR (clustered regularly interspaced short palindromic repeats)  
82 phage engineering<sup>21, 22</sup> provide an extraordinary resource. The atomic structures of all the capsid  
83 proteins including Soc, Hoc, as well as the entire capsid have been determined<sup>15, 18, 19, 23, 24</sup>. Soc  
84 and Hoc can be used as efficient adapters to tether foreign proteins to T4 capsid<sup>25, 26</sup>. Both have  
85 nanomolar affinity and exquisite specificity, allowing up to ~1,025 molecules of full-length proteins,  
86 domains, and peptides to be arrayed on capsid<sup>27, 28</sup>. T4 capsids so decorated with pathogen  
87 epitopes mimic PAMPs (pathogen-associated molecular patterns) of natural viruses and stimulate  
88 strong innate as well as adaptive immune responses<sup>29</sup>.

89 To develop a universal vaccine design template, we took advantage of a large amount of  
90 nonessential genetic space available in T4 genome. Using SARS-CoV-2 as a model pathogen,  
91 we inserted a number of viral components into phage including spike (S)<sup>30, 31</sup>, envelope (E)<sup>32</sup>, and  
92 nucleocapsid proteins (NP)<sup>2, 33</sup> by CRISPR engineering as DNA and/or protein (Figure 1a-d;  
93 Video). These were then combined by simple phage infections to create a collection of  
94 recombinant phages containing different combinations of vaccine targets. In a few weeks, a  
95 pipeline of vaccine candidates in dozens of combinations were generated, demonstrating the

96 unprecedented engineering power and flexibility of this approach. When tested in mouse and  
97 rabbit models, one of the candidates, T4 phage decorated with S-trimers (Figure 1e-g; Video)  
98 elicited robust immunogenicity and ACE-2 (angiotensin converting enzyme-2) receptor<sup>34</sup> blocking  
99 and virus neutralizing antibodies that conferred complete protection against virus challenge in a  
100 mouse model.

101 Our studies thus established a “blueprint” for a new type of nanovaccine framework for  
102 rapid and multiplex design of effective vaccine candidates that can potentially be applied to any  
103 emerging pathogen in the future.

104

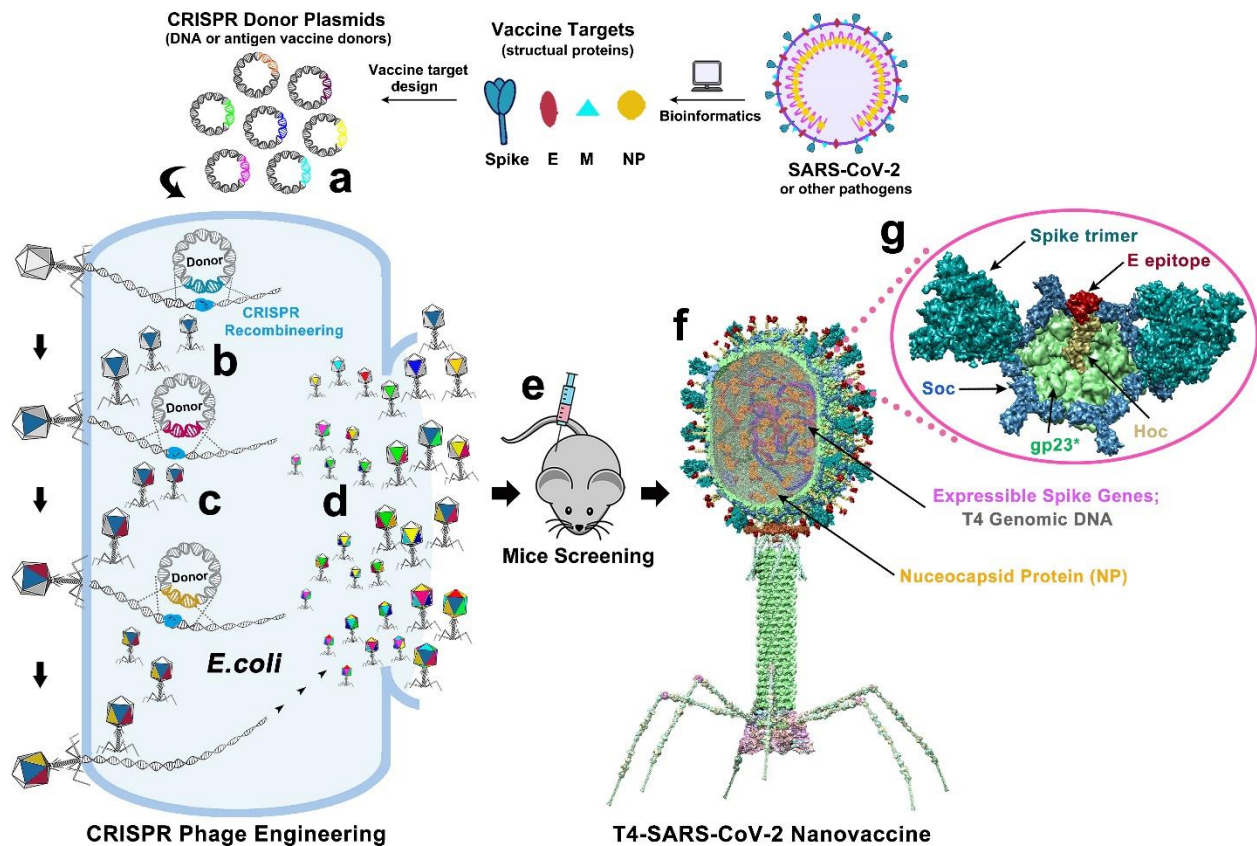

105

106 **Fig. 1 Design of T4-SARS-CoV-2 nanovaccine by CRISPR engineering.** Engineered DNAs  
107 corresponding to various components of SARS-CoV-2 virion are incorporated into bacteriophage  
108 T4 genome. Each DNA was introduced into *E. coli* as a donor plasmid (a), recombined into  
109 injected phage genome through CRISPR-targeted genome editing (b). Different combinations of  
110 CoV-2 inserts were then generated by simple phage infections and identifying the recombinant  
111 phages in the progeny (c). For example, recombinant phage containing CoV-2 insert #1 (dark  
112 blue) can be used to infect CRISPR *E. coli* containing Co-V2 insert containing donor plasmid #2  
113 (dark red). The progeny plaques obtained will contain recombinant phage #3 with both inserts #1

114 and #2 (dark blue plus dark red) in the same genome. This process was repeated to rapidly  
115 construct a pipeline of multiplex T4-SARS-CoV-2 vaccine phages **(d)**. Selected vaccine  
116 candidates were then screened in a mouse model **(e)** to identify the most potent vaccine **(f)**.  
117 Structural model of T4-SARS-CoV-2 Nanovaccine showing an enlarged view of a single  
118 hexameric capsomer **(g)**. The capsomer shows six subunits of major capsid protein gp23\* (green),  
119 trimers of Soc (blue), and a Hoc fiber (yellow) at the center of capsomer. The expressible spike  
120 genes are inserted into phage genome, the 12 aa E external peptide (red) is displayed at the tip  
121 of Hoc fiber, S-trimers (cyan) are attached to Soc subunits, and nucleocapsid proteins (yellow)  
122 are packaged in genome core. See Results, Materials and Methods, and Supplementary Video  
123 for additional details.  
124

## 125 **Results**

### 126 **Construction of T4-SARS-CoV-2 recombinant phages by CRISPR engineering**

127 A series of CRISPR-*E. coli* strains were constructed by inserting SARS-CoV-2 gene  
128 segments into T4 phage genome. Each strain harbored two plasmids (Fig. 2a); a “spacer” plasmid  
129 expressing the genome-editing nuclease, either type II Cas9 or type V Cpf1, and CRISPR RNAs  
130 (crRNAs or “spacer” RNAs) corresponding to target protospacer sequence(s) in phage genome,  
131 and a second “donor” plasmid containing the SARS-CoV-2 sequence. The latter also has ~500  
132 bp homologous flanking arms of phage genome corresponding to the point of insertion. Four  
133 nonessential regions of the genome were chosen for insertion of various SARS-CoV-2 genes (Fig.  
134 2b, I-IV). When these *E. coli* were infected by T4, a double-stranded break would occur in the  
135 protospacer sequence by Cas9 or Cpf1 that inactivates the phage genome and no phage should  
136 be produced. However, the highly recombinogenic T4 phage allows efficient recombination  
137 between the cleaved DNA and the donor plasmid through the flanking homologous arms,  
138 transferring the CoV-2 gene into phage genome and propagating it as part of phage infection (Fig.  
139 2a). The same strategy was used to introduce many other genetic modifications including  
140 deletions by simply creating that modification in the donor plasmid and various modifications were  
141 combined as desired by simple phage infections of appropriate CRISPR *E. coli* (Fig. 1).

142 Initially, we constructed “acceptor” phages by deleting certain known nonessential segments  
143 of the phage genome<sup>35</sup>; ~18 kb FarP, ~11-kb 39-56, or both (~29 kb), that created space for CoV-

144 2 insertions (Supplementary Fig.1a,b). But the yields of these phages were low, ~1-2 orders of  
145 magnitude lower than the wild-type (WT) phage (Supplementary Fig.1a,b). Since yield is critical  
146 for vaccine manufacture, we then constructed shorter deletions in which ~700 bp SegF within 39-  
147 56 and ~7 kb segment within FarP were deleted (Fig. 2b I, II). The yields of these phages  
148 (*7del.SegFdel.T4*) were similar to the WT phage, suitable for SARS-CoV-2 vaccine design.

149 Next, three spike gene variants<sup>31</sup> corresponding to i) 1273-amino acid (aa) WT full-length  
150 (S-fl), ii) 1208 aa ectodomain (S-ecto, aa 1-1208), and iii) 227 aa receptor binding domain (RBD,  
151 aa 319-545) were engineered as expressible cassettes and inserted into *7del.SegFdel.T4* (Fig.  
152 2b, Supplementary Fig. 1c). The spike genes were codon-optimized and kept under the control  
153 of a strong mammalian expression promoter, either CMV or CAG, and a human CD5 signal  
154 peptide fused to the N-terminus for efficient secretion (Fig. 2b I, II, Supplementary Fig. 1d). The  
155 S-ectodomain recombinant contained additional mutations including six proline substitutions that  
156 imparted greater stability and ~10-fold greater expression, as was described by Hsieh *et al.*<sup>31</sup> (Fig.  
157 2b, Supplementary Fig. 1d).

158 Control CRISPR *E. coli* containing Cas9/Cpf1-spacer plasmid but lacking the spike gene  
159 donor plasmids yielded very few or no plaques when infected with *7del.SegFdel* phage (plating  
160 efficiency,  $<10^{-4}$  to  $10^{-3}$ ; Fig. 2c,d, Supplementary Fig. 1e) whereas those containing both the  
161 plasmids produced plaques at a recombination frequency of up to ~4.5% (Fig. 2d,e). DNA  
162 sequencing confirmed that >95% of these plaques were true recombinants with correct insert (Fig.  
163 2f) and showed similar plaque forming ability as the WT phage (Fig. 2g). A similar CRISPR  
164 strategy was used for creating deletions and/or insertions at the other sites [internal protein (IP)II,  
165 IPIII, Hoc, and Soc] (Fig. 2b; Supplementary Fig. 1f).

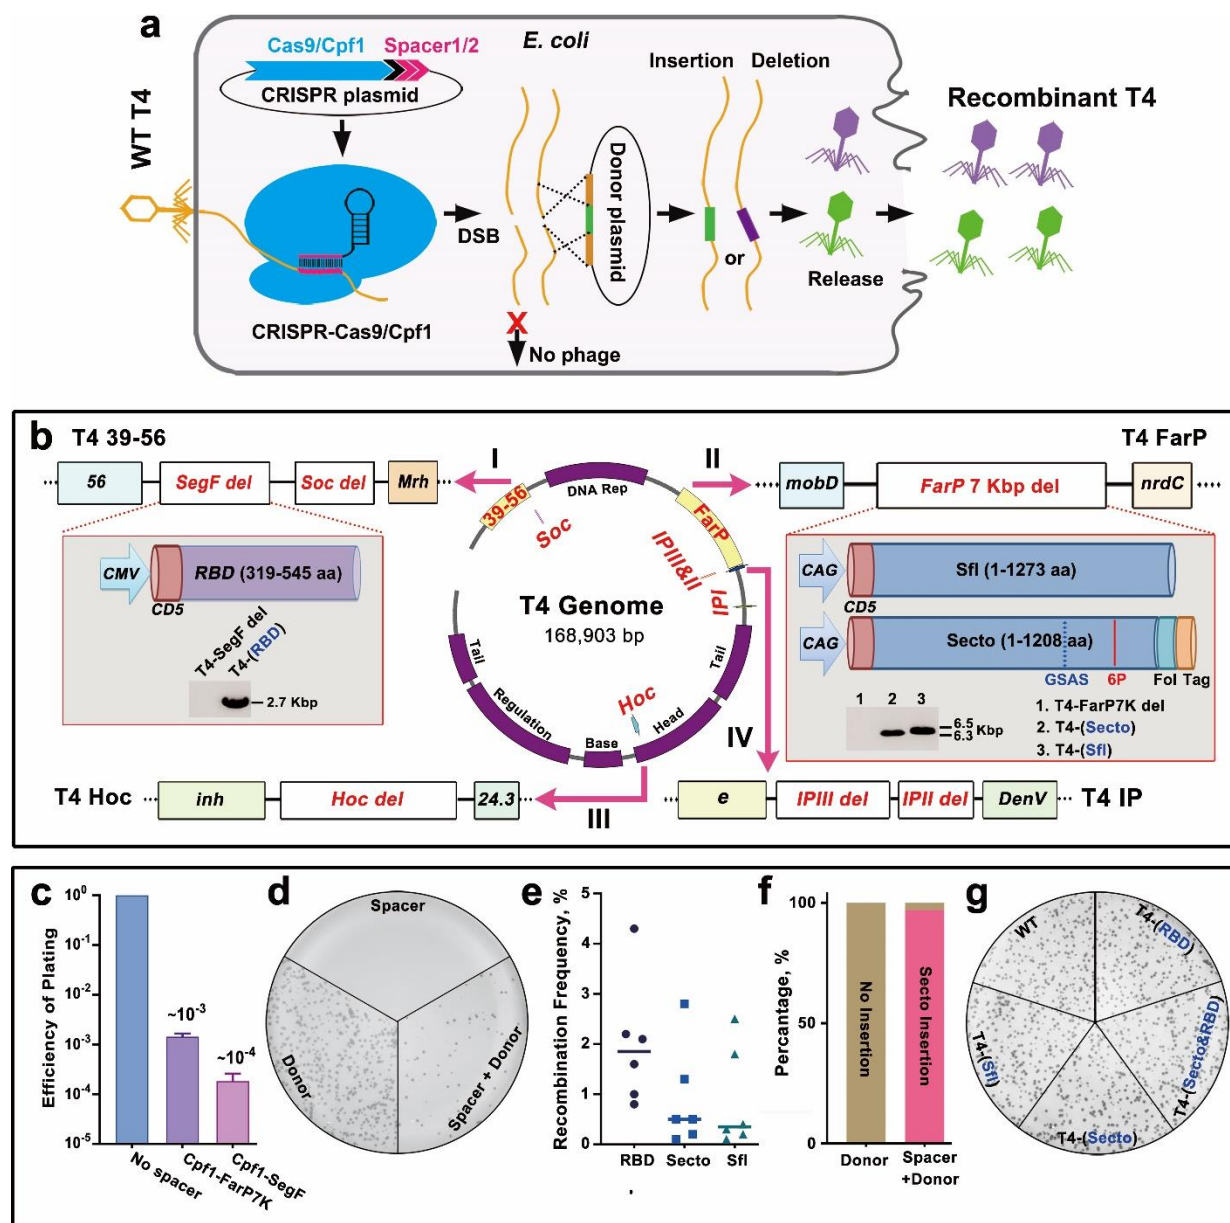

166

167 **Fig. 2 Construction of T4-SARS-CoV-2 recombinant phages by CRISPR engineering. a.**  
 168 Schematic of T4 CRISPR engineering. **b.** Four nonessential regions of T4 genome are chosen  
 169 for deletion and insertion of various SARS-CoV-2 genes (shown in red; *SegF/Soc*, *FarP*, *IP*, and  
 170 *Hoc*). 6P, six proline substitutions in S-ecto (F817P, A892P, A899P, A942P, K986P, and V987P).  
 171 *Fol*, T4 fibrin motif Foldon for efficient trimerization. *Tag*, octa-histidine and twin-strep tags. Furin  
 172 cleavage site RRAR was mutated to GSAS to stabilize trimers in a prefusion state<sup>31</sup>. **c.** Efficiency  
 173 of plating (EOP) of representative Cpf1-FarP7K and Cpf1-SegF spacers. **d.** Plate showing  
 174 plaques from phage infection of bacteria containing Cpf1-FarP7K spacer only, S-ecto donor only,  
 175 or Cpf1-FarP7K spacer plus S-ecto donor. **e.** Recombination frequency of three spike gene (RBD,  
 176 S-ecto, and S-fl) insertions. **f.** DNA sequencing of thirty independent plaques showed that >95%  
 177 of the plaques generated in S-ecto recombination contained the correct S-ecto insert. **g.** Plate  
 178 showing that the wild-type (WT), T4-RBD, T4-S-fl, T4-S-ecto, and T4-(S-ecto)-RBD recombinant  
 179 phages had similar plaque size.

180



181

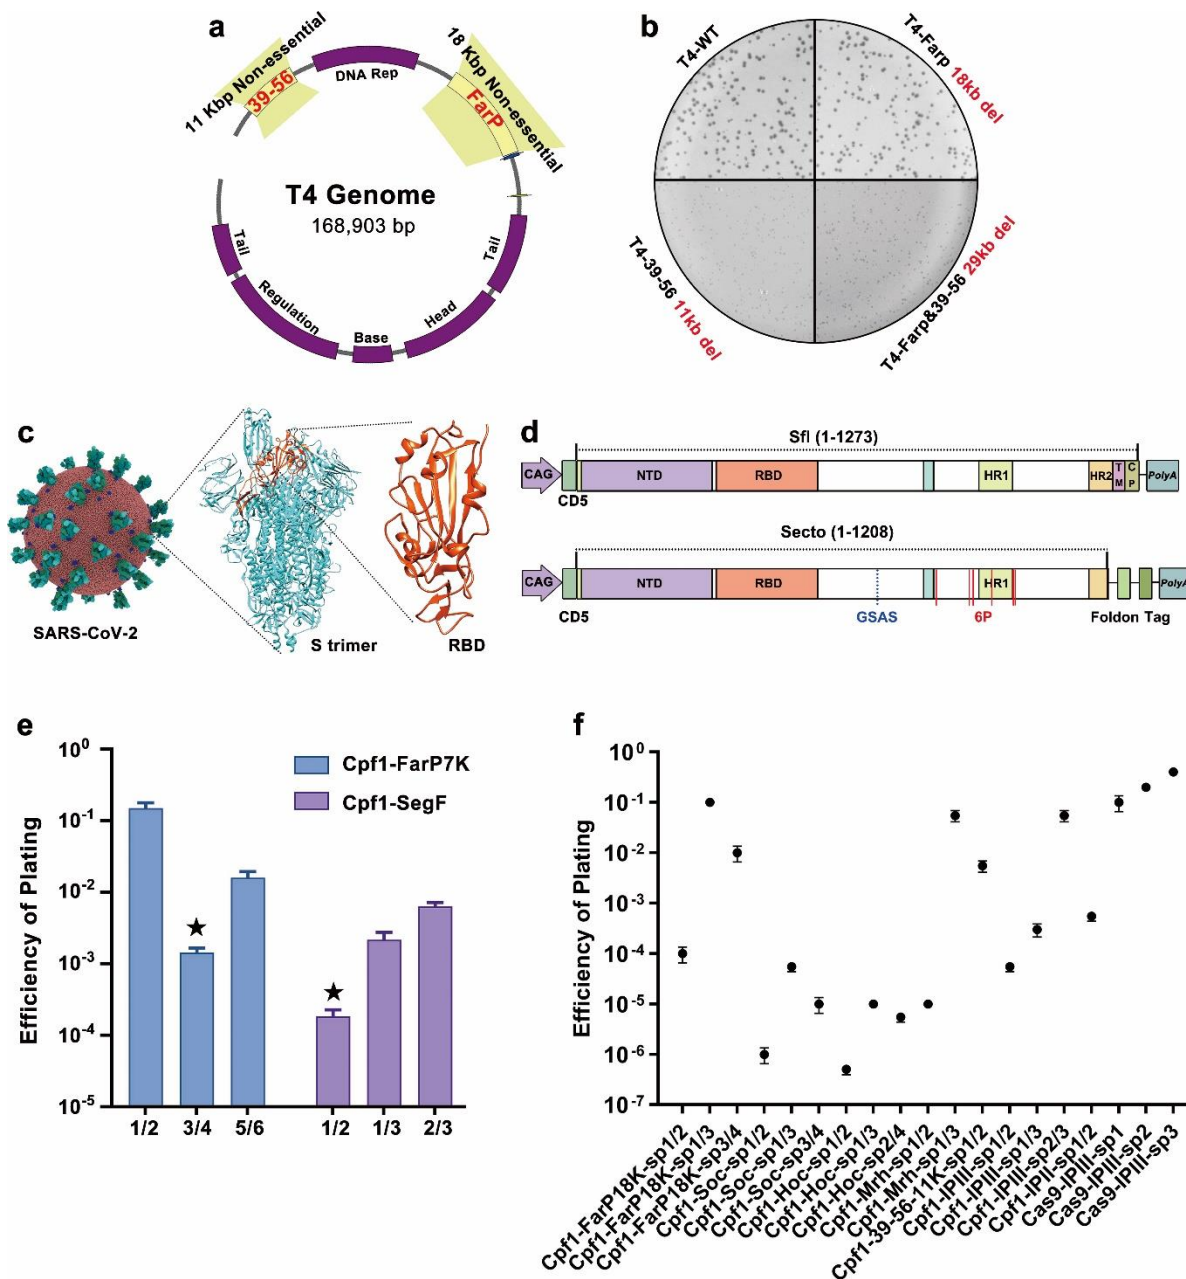

182

183 **Supplementary Fig. 1 CRISPR engineering of non-essential T4 genome.** **a.** Schematic  
 184 showing the 18-kb nonessential segment FarP and 11-kb nonessential segment 39-56 on T4  
 185 genome. **b.** Plaque size of wild-type (WT), T4-FarP 18 kb del., T4-39-56 11 kb del., and T4-  
 186 FarP&39-56 29 kb del. phages. Note the small size of T4-39-56 11 kb del. and T4-FarP&39-56  
 187 29 kb del. plaques. **c.** Structural models of SARS-CoV-2 virus, spike trimer, and receptor binding  
 188 domain (RBD). **d.** Schematics of S-full length (S-fl) and S-ectodomain (S-ecto) expression  
 189 cassettes used for insertion into T4 genome. **e.** Efficiency of plating of three sets of Cpf1-FarP7K  
 190 spacers and three sets of Cpf1-SegF spacers. **f.** Efficiency of plating of various spacers used for  
 191 T4 genome engineering in this study.

192

## 193 **Encapsidation of SARS-CoV-2 nucleocapsid protein (NP)**

194 SARS-CoV-2 infected patients have been reported to generate robust NP-specific immune  
195 responses including cytotoxic T cells that might be important for protection and virus clearance<sup>33</sup>.  
196 <sup>36</sup>. We incorporated NP into the T4 nanoparticle by designing a CRISPR strategy that packaged  
197 NP molecules inside phage capsid along with the genome. As NP is a nucleic acid binding protein,  
198 the packaged phage genome might provide an appropriate environment to localize this protein<sup>37</sup>.

199 During T4 phage morphogenesis, the major capsid protein gp23 assembles around a  
200 scaffolding core formed by a cluster of proteins including three nonessential, highly basic, internal  
201 proteins IPI, IPII, and IPIII. Following assembly, while most of the scaffold proteins are degraded  
202 and expelled from capsid (Fig. 3a), the IPs are cleaved only once, next to a ~10 aa N-terminal  
203 capsid targeting sequence (CTS; MKTYQEFIAE). The cleaved CTS leaves the capsid but ~1,000  
204 molecules of IPs, or any foreign protein fused to CTS, remain in the “expanded” capsid<sup>38</sup> (Fig. 3a).  
205 To replace IPs with NP, we first created an IPIII deletion phage using appropriate spacer and  
206 donor (Supplementary Fig. 2a, Fig. 3b). Then, a CTS-NP fusion sequence was transferred into  
207 this phage under the control of the native IPIII promoter (Supplementary Fig. 2a). Next, IPII was  
208 deleted to reduce protein packaging competition and increase the copy number of NP  
209 (Supplementary Fig. 2a, Fig. 3b,c). We have also introduced an amber mutation into the CTS  
210 sequence [TTT (Phe) at aa 7] because, for unknown reasons, the donor plasmid containing the  
211 WT CTS sequence was found to be toxic to *E. coli*. This CTS<sub>am</sub>-NP phage when grown on a  
212 tRNA amber suppressor-containing *E. coli* (*Sup*<sup>1</sup>) expressed NP and encapsidated it as  
213 demonstrated by Western blotting (WB) with NP-specific monoclonal Abs (Fig. 3c, Supplementary  
214 Fig. 2b,c). The copy number is about 70 NP molecules per phage capsid (Supplementary Fig.  
215 2d).

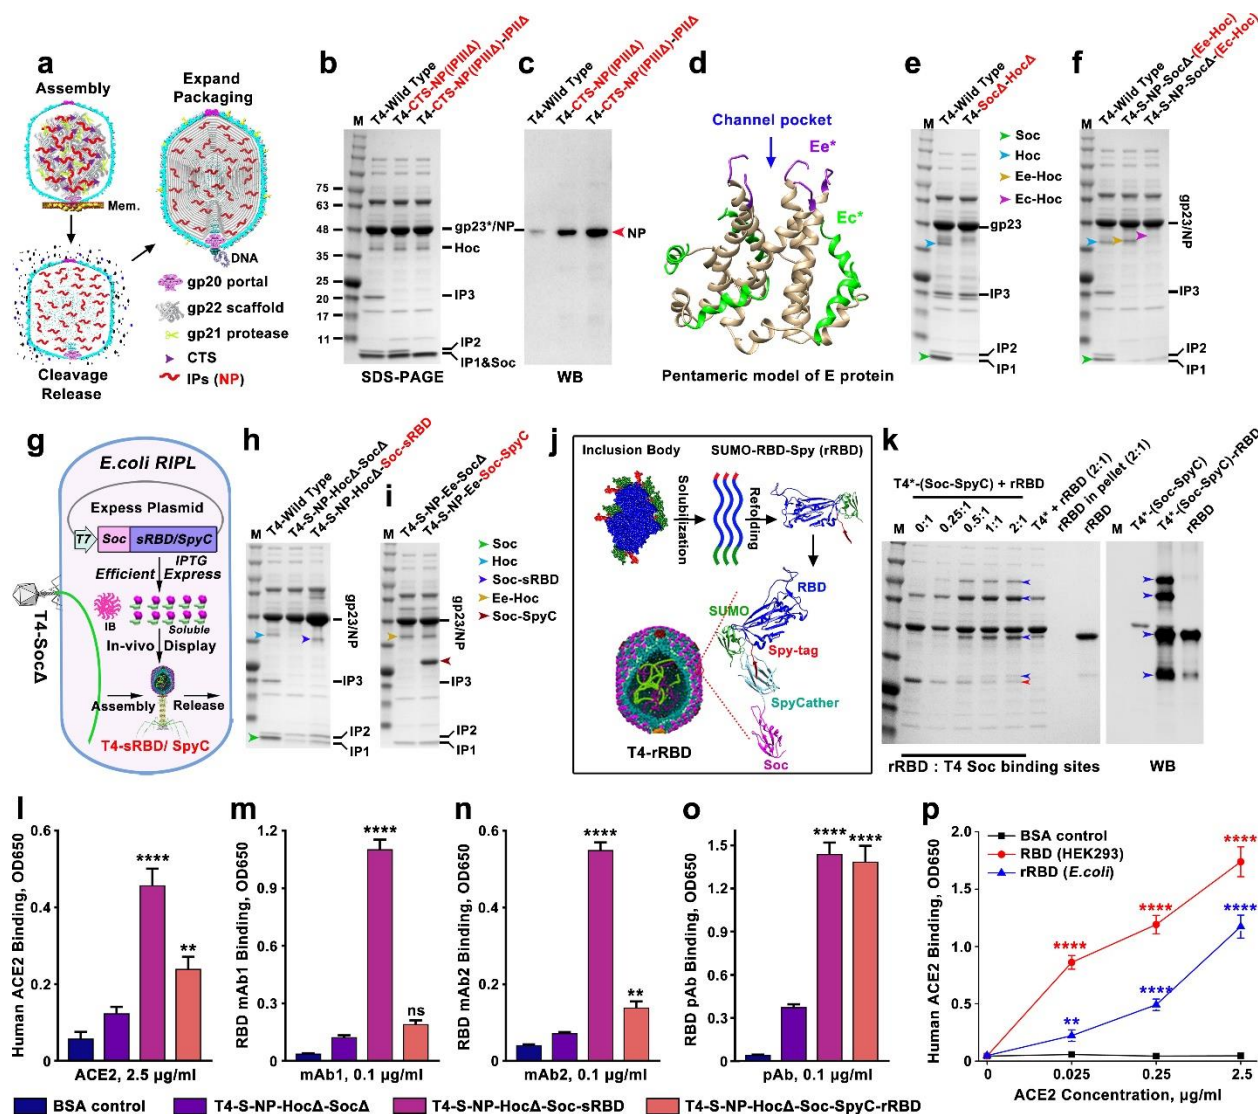

216

217 **Fig. 3 Incorporation of various SARS-CoV-2 vaccine payloads into phage T4 nanoparticle.**

218 **a.** Schematic showing steps in T4 phage head morphogenesis. Mem, *E. coli* membrane; CTS,

219 capsid targeting sequence. **b** and **c.** SDS-PAGE and Western Blot (WB) analysis of phage

220 particles with IPII and IPIII deletions (IPIIΔIPIIIΔ) and NP encapsidation. Since NP has a very

221 similar molecular size to T4 major capsid protein gp23\*, an NP-specific antibody was used to

222 detect NP. **d.** Structural model of viroporin-like tetrameric assembly of CoV-2 E protein<sup>32</sup>. The N-

223 terminal seven residues and C-terminal ten residues are not shown due to the lack of a

224 corresponding segment in the structural template used for homology modeling. Ee\* indicates

225 amino acids (aa) 8-12 and Ec\* indicates aa 53-65. **e.** SDS-PAGE of Hoc deletion and Soc deletion

226 phage (HocΔSocΔ). **f.** SDS-PAGE of recombinant phages displaying Ee-Hoc or Ec-Hoc fusion

227 proteins. **g.** Schematic showing Soc-sRBD or Soc-SpyCatcher (SpyC) *in vivo* display on T4-SocΔ

228 capsid. Soc-sRBD or Soc-SpyCatcher expression under the control of phage T7 promoter was

229 induced by IPTG. Most of the expressed Soc-RBD was in the inclusion body (IB). Soluble Soc-

230 sRBD (minor amount) or Soc-SpyC can be efficiently displayed on capsid. **h.** SDS-PAGE showing

231 ~100 copies of Soc-sRBD displayed on T4 capsid. **i.** SDS-PAGE showing ~500 copies of Soc-

232 SpyCatcher displayed on T4 capsid. **j.** Schematic diagram showing the solubilization and refolding

233 of SUMO (small ubiquitin like modifiers)-RBD-Spytag inclusion body. Refolded SUMO-RBD-

234 Spyttag (rRBD) protein was efficiently displayed on T4-SpyCatcher phage via Spyttag-SpyCatcher  
 235 bridging. **k.** Display of rRBD on the T4-SpyCatcher surface at increasing ratios of rRBD molecules  
 236 to capsid Soc binding sites (0:1 to 2:1). RBD specific antibody was used to verify the displayed  
 237 rRBD and rRBD-SpyCatcher-Soc complexes. T4\* indicates T4-S-ecto-NP-Ec-SocΔ recombinant  
 238 phage. Blue and red arrows indicate rRBD/complexes and Soc-SpyCatcher, respectively. **l** to **o.**  
 239 Comparison of binding of T4-sRBD, and T4-rRBD phages to soluble human ACE2 receptor (l),  
 240 monoclonal antibody (mAb) 1 (human IgG Clone #bcb03, Thermo Fisher) (m), mAb2 (rabbit IgG  
 241 Clone #007, Sino Bio) (n), and polyclonal antibodies (pAb) (rabbit PAb, Sino Bio) (o) using BSA  
 242 and T4 phage as controls. **p.** Comparison of binding of *E. coli*-produced rRBD to human ACE2  
 243 with the HEK293-produced RBD. \*\*P < 0.01 and \*\*\*\*P < 0.0001. ns, no significance, P > 0.05.  
 244

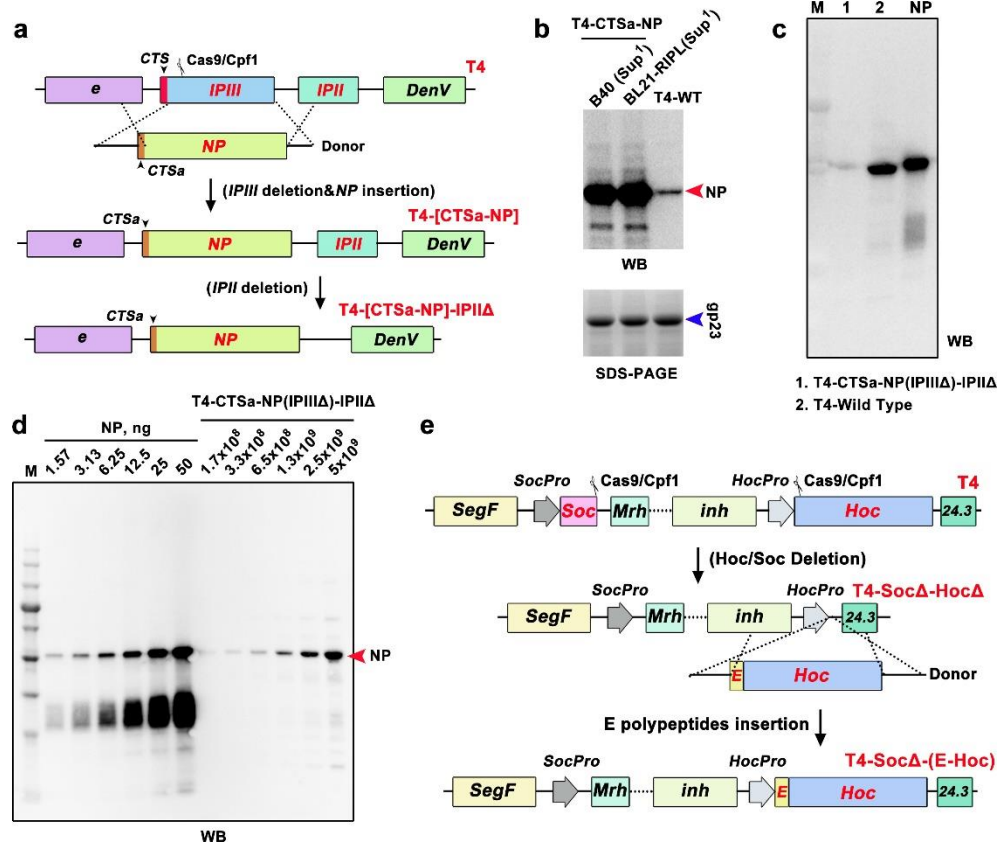

245  
 246 **Supplementary Fig. 2 Engineering of NP encapsidation and Ee epitope display. a.**  
 247 Schematic showing the construction of T4-IPIIIΔ-IPIIΔ-CTSam-NP phage. **b.** WB showing NP  
 248 expression and encapsidation in *E. coli* B40 (*Sup*<sup>1</sup>) and BL21-RIPL (*Sup*<sup>1</sup>) infected with T4-CTSa-  
 249 NP phage. **c.** A second NP-specific monoclonal antibody was used to confirm the encapsidation  
 250 of NP in T4-CTSa-NP phage. **d.** Quantification of the copy number of T4-encapsidated NP protein  
 251 molecules by WB using commercial NP standard (Sino Bio). **e.** Schematic showing the  
 252 construction of T4-SocΔ-HocΔ and T4-SocΔ-(E epitope-Hoc) phages.  
 253

## 254 Display of SARS-CoV-2 epitopes on T4 phage

255 Next, we incorporated SARS-CoV-2 antigens onto the nanoparticle surface. We first  
 256 deleted Hoc and Soc genes from the above recombinant phages and then inserted Hoc- and Soc-

257 fused CoV-2 genes under the control of their respective native promoters. Upon infection, these  
258 phages would express and assemble the epitopes on T4 capsid surface (Supplementary Fig. 2e,  
259 Fig. 3d,e). We fused the gene segments corresponding to the N-terminal 12-aa “external domain”  
260 peptide (Ee) or the 18-aa peptide from the C-terminal domain (Ec) of E protein to the N-terminus  
261 of Hoc (Fig. 3d). These peptides are predicted to be exposed on the SARS-CoV-2 virion and  
262 shown to elicit T cell immune responses in humans<sup>32</sup>. By virtue of fusion to N-terminus of Hoc,  
263 these epitopes would be exposed at the tip of ~170 Å-long Hoc fiber<sup>19</sup>. The Ee and Ec recombinant  
264 phages indeed showed an upward shift of the Hoc band upon SDS-PAGE (Fig. 3f; yellow and  
265 magenta arrows). However, only the 12-aa Ee peptide was displayed at the maximum copy  
266 number, up to ~155 copies per capsid, while the 18-aa Ec peptide showed lower epitope copies  
267 and also affected phage yield (Fig. 3f).

268

#### 269 **Display of SARS-CoV-2 receptor binding domain on T4 phage**

270 We used a similar strategy to display CoV-2 receptor binding domain (RBD)<sup>34</sup> on the capsid  
271 surface as a Soc-fusion (Supplementary Fig. 3a,b). However, the copy number of the displayed  
272 RBD was very low (Supplementary Fig. 3c). RBD contains ~82.5% non-hydrophilic residues and  
273 formed insoluble inclusion bodies in *E. coli* (Supplementary Fig. 3d,e). Numerous N- and C-  
274 terminal truncations of RBD were constructed (Supplementary Fig. 4a), however none (including  
275 the shortest 67-aa receptor binding motif<sup>34</sup>) had shown significant improvement in solubility and  
276 copy number (Supplementary Fig. 4b). We therefore resorted to alternative strategies to display  
277 RBD on phage capsid.

278 First, we constructed *E. coli* expressing Soc-RBD from a plasmid under the control of the  
279 phage T7 promoter to determine if pre-expression of Soc-RBD for a short period of time (~10 min)  
280 would keep it sufficiently soluble, which could then assemble on capsids produced during phage  
281 infection. Indeed, phage isolated from these infections showed improved display, ~100 copies of  
282 RBD (sRBD) per phage particle (Fig. 3g,h).

283 Second, we deployed the well-established Spytag-SpyCatcher technology<sup>39</sup> to display RBD  
284 on T4 phage. The optimized SpyCatcher and Spytag from *Streptococcus pyogenes*, interact  
285 with >picomole affinity (approaching “infinite” affinity; second-order rate constant:  $5.5 \times 10^5 \text{ M}^{-1}$   
286  $\text{s}^{-1}$ ) and exquisite specificity that then leads to covalent linkage<sup>39</sup>. To display RBD, phage  
287 decorated with the 12.6-kDa soluble SpyCatcher was produced by growing the T4-Spike-Ee-NP-  
288 SocΔ phage on *E. coli* expressing Soc-SpyCatcher fusion protein from the T7 expression plasmid  
289 (Supplementary Fig. 3f, Fig. 3g). Phage prepared from these infections contained up to ~600  
290 copies of Soc-SpyCatcher per capsid (Fig. 3i).

291 Third, RBD was expressed as SUMO-RBD-Spytag fusion protein in *E. coli*. The SUMO  
292 domain is expected to enhance the solubility of RBD<sup>40</sup>, but resulted in only a small improvement  
293 (Supplementary Fig. 3g). Therefore, the SUMO-RBD-Spytag protein was purified from insoluble  
294 inclusion bodies by urea denaturation and refolding (rRBD), and was displayed *in vitro* on the  
295 SpyCatcher phage (Fig. 3j). SDS-PAGE and WB of the phage particles showed that the SUMO-  
296 RBD-Spytag was efficiently captured by the SpyCatcher phage as shown by the disappearance  
297 of the SpyCatcher band and appearance of higher molecular weight band(s) (Fig. 3k). The copy  
298 number was ~300 rRBD molecules per capsid (Fig. 3k).

299 The sRBD and rRBD phages produced as above (T4-Spike-Ee-CTS<sub>am</sub>-NP-sRBD and T4-  
300 Spike-Ee-CTS<sub>am</sub>-NP-rRBD) bound to human ACE2 receptor protein<sup>34</sup> (Fig 3l, Supplementary Fig.  
301 5a), and to some of the RBD-specific monoclonal antibodies (mAbs) and polyclonal antibodies  
302 (pAbs) but not to all (Fig. 3m to 3o, Supplementary Fig. 5b to 5d). However, these RBDs exhibited  
303 considerably lower binding when compared to mammalian-expressed RBD suggesting that the *E.*  
304 *coli*-produced RBDs were not properly folded (Fig. 3p). This was also consistent with the co-  
305 purification of a 65-kDa *E. coli* GroEL chaperone with RBD indicating the presence of partially  
306 folded and/or misfolded RBD (Supplementary Fig. 3e).

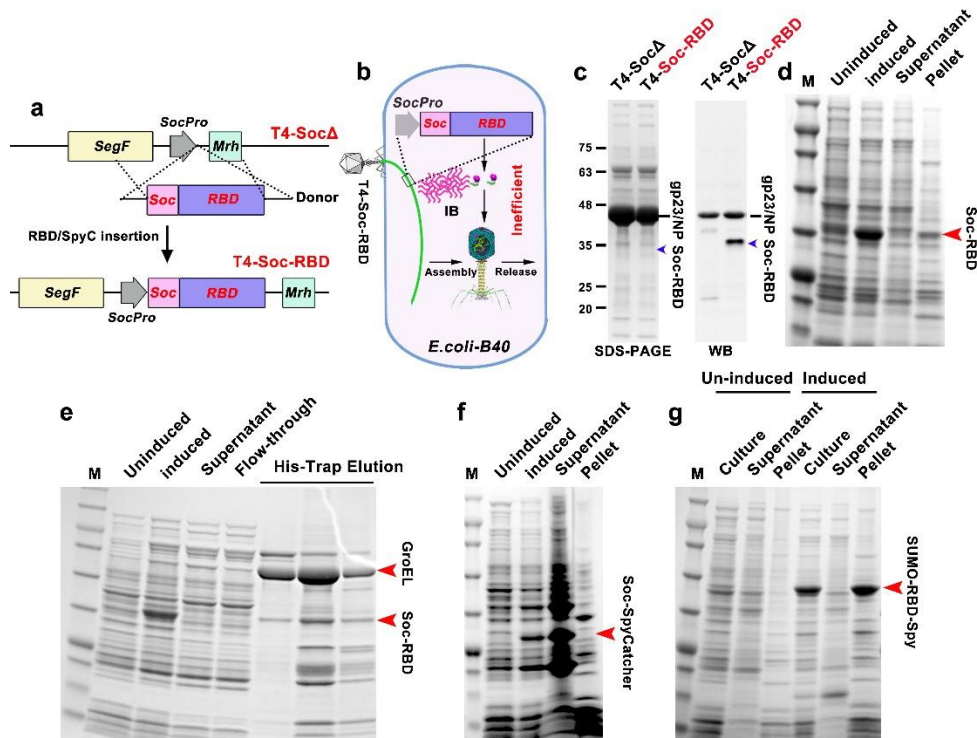

307

308 **Supplementary Fig. 3 Engineering and solubility analysis of Soc-RBD, SUMO-RBD-Spytag,**  
 309 **and Soc-SpyCatcher constructs.** **a.** Schematic showing the insertion of Soc-RBD gene into  
 310 phage genome at the Soc deletion site. **b and c.** Schematic (b) and SDS-PAGE/WB (c) showing  
 311 inefficient *in vivo* display of *E. coli*-expressed sRBD on T4 phage. IB, inclusion body. No significant  
 312 Soc-RBD band was observed by SDS-PAGE but it could be detected by WB. Anti-RBD polyclonal  
 313 antibody (Sino Bio) used here also un-specifically recognized T4 gp23. **d.** Solubility analysis of  
 314 Soc-RBD. The presence of Soc-RBD in the pellet and absence in the supernatant of *E. coli* lysate  
 315 indicates insolubility. **e.** Very little soluble Soc-RBD was recovered after concentration of the any  
 316 soluble Soc-RBD by purification on a HisTrap Ni<sup>2+</sup> affinity column. No significant Soc-RBD was  
 317 detected in supernatant and flow-through, but a small amount of Soc-RBD was co-eluted with *E.*  
 318 *coli* GroEL chaperone. **f.** Solubility analysis of Soc-SpyCatcher. Soc-SpyCatcher expression was  
 319 driven by the phage T7 promoter. Most of the expressed Soc-SpyCatcher protein remained in the  
 320 supernatant indicating its high solubility. **g.** Solubility analysis of SUMO-RBD-Spytag. SUMO-  
 321 RBD-Spytag is insoluble, similar to Soc-RBD.

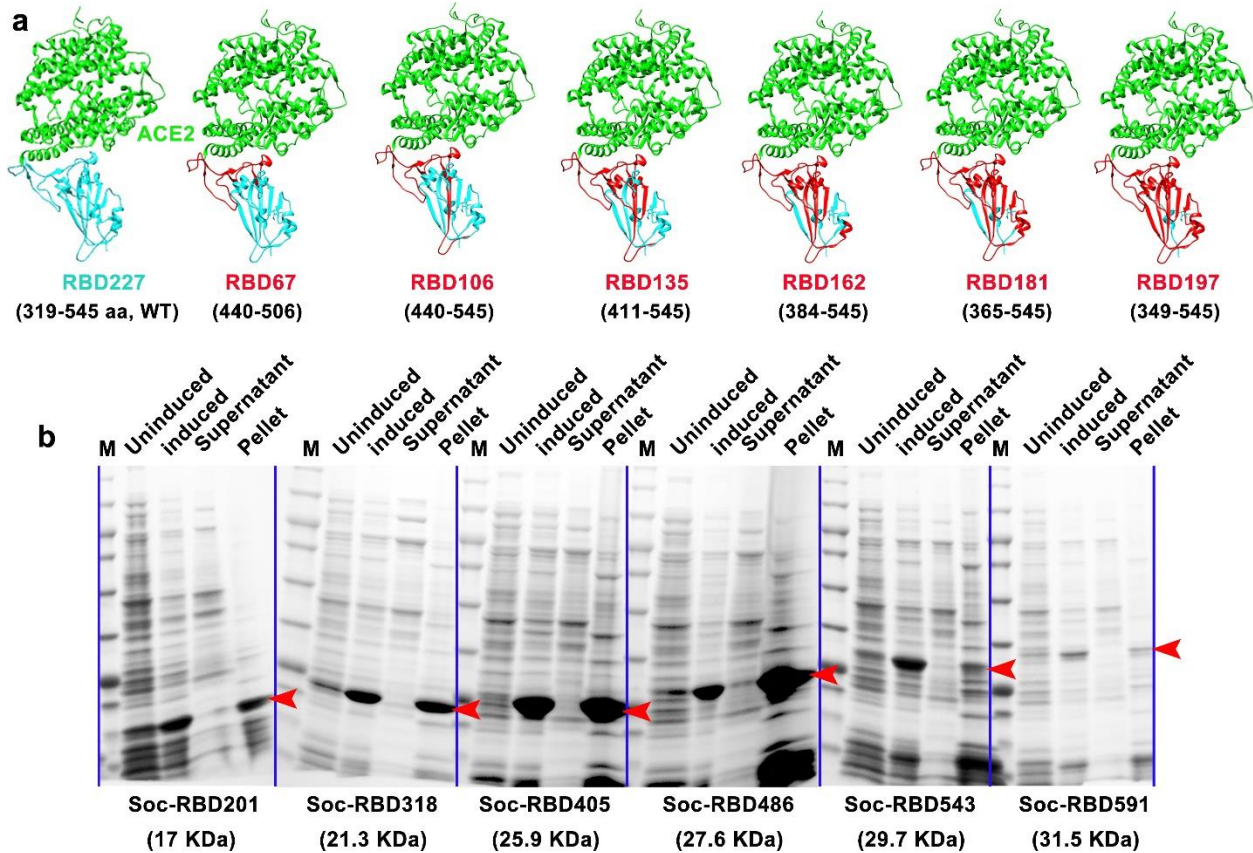

322

323 **Supplementary Fig. 4 Construction and screening of various truncated SARS-CoV-2 RBDs.**  
324 **a.** Structural models of recombinant WT RBD and various truncated RBDs bound to human ACE2.  
325 ACE2 is shown in green. The truncated RBD clones are shown in red and the WT RBD and  
326 deleted regions are shown in cyan. The Protein Data Bank (PDB) code for the SARS-CoV-2 RBD–  
327 ACE2 complex is 6M0J<sup>34</sup>. The truncated RBDs were generated using Chimera software. **b.**  
328 Solubility analysis of Soc-fused truncated RBDs after cloning and expression in *E. coli* under the  
329 control of the phage T7 promoter. After lysis of *E. coli* and centrifugation, the supernatant and  
330 pellet were analyzed by SDS-PAGE. The presence of Soc-truncated RBDs in the pellet and their  
331 absence in the supernatant demonstrated insolubility. The red arrowheads indicate the band  
332 positions of various Soc-truncated RBDs.  
333



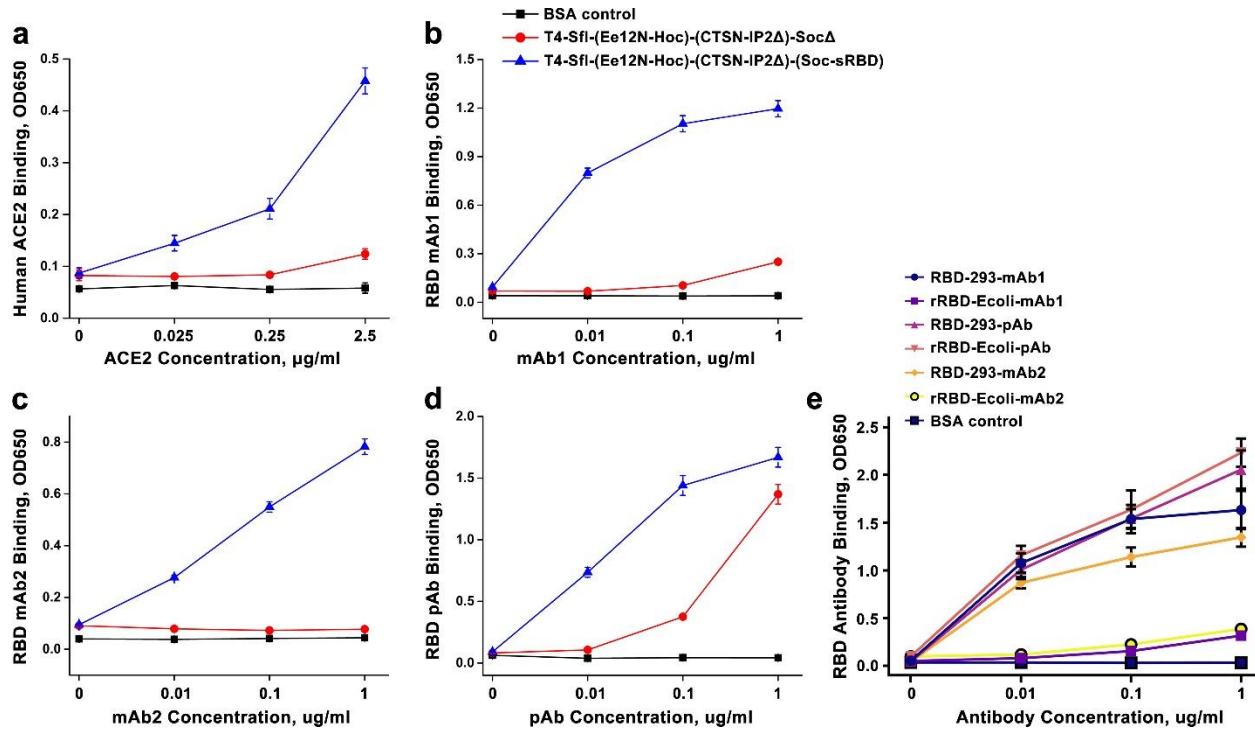

334

335 **Supplementary Fig. 5 Comparison of ACE2 and RBD-antibody binding of T4-sRBD, *E.coli*-**  
 336 **rRBD, and HEK293-RBD. a to d.** ACE2 and a panel of RBD-specific antibodies used for  
 337 quantification by ELISA. **e.** Comparison of *E. coli*-produced rRBD and human HEK293-produced  
 338 RBD using a panel of RBD-specific mAbs and pAbs. The HEK293-RBD showed much greater  
 339 binding to mAb1 and mAb2 than the *E. coli* rRBD, while binding to pAbs was similar.

340

### 341 **Decoration of phage T4 nanoparticles with spike ectodomain trimers**

342 Next, we displayed spike ectodomain (S-ecto) trimers (S-trimer) (433.5 kDa)<sup>31</sup> on T4-  
 343 Spike-Ee-NP-Soc $\Delta$  phage. The pre-fusion stabilized hexa-Pro S-ectodomain construct described  
 344 as above<sup>31</sup> was fused to a 16-aa spytag at the C-terminus and expressed in ExpiCHO cells. The  
 345 ectodomain trimers secreted into the culture medium were purified by HisTrap affinity  
 346 chromatography and size-exclusion chromatography (Supplementary Fig. 6a,b). These trimers  
 347 appeared authentic and native-like because: i) they migrated predominantly as a single species  
 348 and showed no nonspecific aggregation, which usually appears as a peak (or shoulder) near void  
 349 volume and as a smeary high molecular weight species on native gel (Supplementary Fig. 6a,b),  
 350 and ii) they bound efficiently to human ACE2 receptor (Supplementary Fig. 6c) and to  
 351 conformation-specific RBD mAbs (Supplementary Fig. 5e). Importantly, the S-trimers were

352 efficiently captured by the SpyCatcher phage produced as above. Binding was so strong that  
 353 efficient assembly occurred by simple mixing of trimers and phage even at an equimolar ratio of  
 354 S-trimers to T4-spycatcher molecules (Fig. 4a,b). The copy number was ~100 S-trimers per phage  
 355 capsid (Fig. 4b). Cryo-EM showed decoration of T4 phage capsids with S-trimers (Fig. 4c),  
 356 mimicking the orientation of spikes on SARS-CoV-2 virion<sup>41</sup>. The trimer-decorated T4 phage  
 357 efficiently bound to human ACE2 receptor (Fig. 4d, Supplementary Fig. 7a) and when co-  
 358 displayed with GFP, it decorated the ACE2-expressing HEK293 cells (Fig. 4e, Supplementary Fig.  
 359 7b, c).

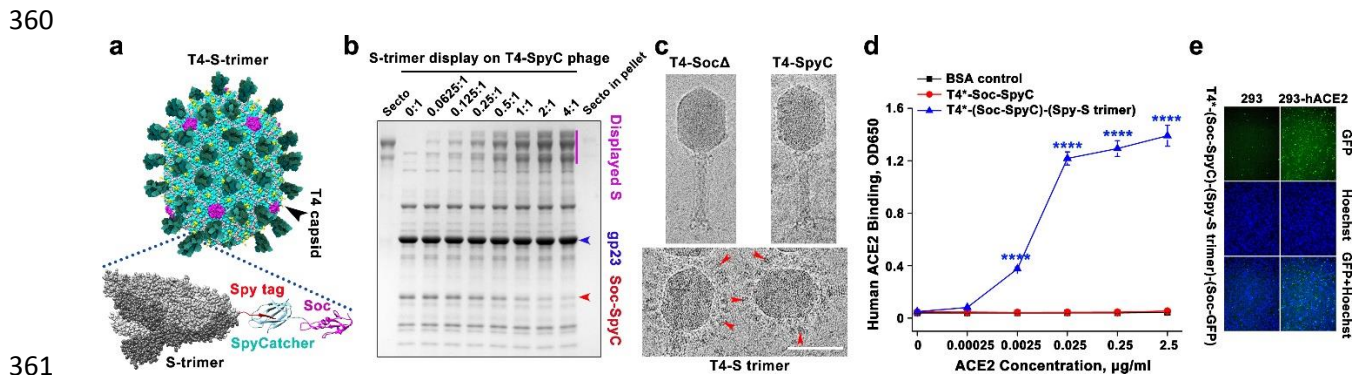

361

362 **Fig. 4. Decoration of phage T4 nanoparticles with spike ectodomain trimers.** **a.** Schematic  
 363 showing the decoration of phage T4 nanoparticles with spike ectodomain trimers via Spytag-  
 364 SpyCatcher bridges. **b.** *In vitro* assembly of S-trimers on T4-SpyCatcher phage at increasing  
 365 ratios of S-trimer molecules to Soc binding sites (0:1 to 4:1). Phage and S-trimer were incubated  
 366 at 4°C for 1 hr, followed by centrifugation to remove the unbound material. After two washes, the  
 367 pellet was re-suspended in buffer and SDS-PAGE was performed. **c.** Representative cryo-EM  
 368 images showing T4-SocΔ, T4-(Soc-SpyCatcher), and T4-(Soc-SpyCatcher)-S-trimers phages.  
 369 The red arrowhead indicates the representative S-trimer displayed on phage. Bar = 100 nm. **d.**  
 370 ELISA analysis of T4-S-trimer phage binding to ACE2 at various ACE2 concentrations. \*\*\*\*P <  
 371 0.0001. **e.** Binding of T4-S-trimer-GFP phage to HEK293 cells expressing human ACE2. The  
 372 nucleus was stained with Hoechst. T4\* indicates T4-(S-ecto)-RBD-NP-Ee-SocΔ phage used for  
 373 display (S-ecto and RBD refer to insertions of gene expression cassettes).  
 374

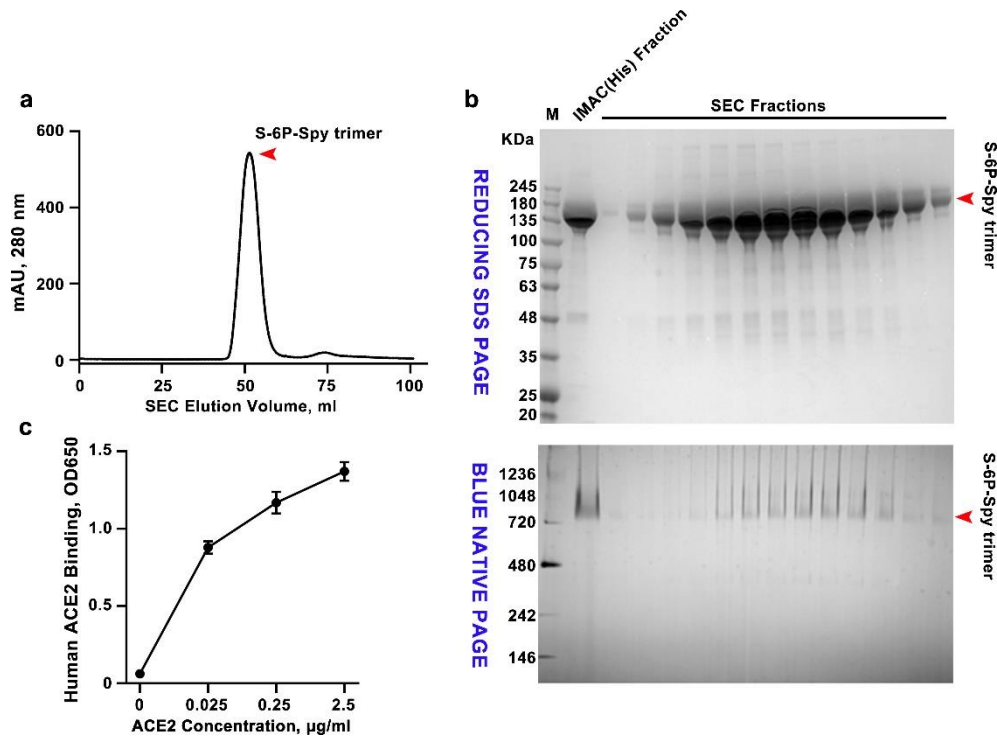

375

376 **Supplementary Fig. 6 Purification and characterization of S-ecto-spytag trimers from**  
377 **ExpiCHO cells.** a. Size-exclusion chromatography (SEC) elution profile of S-ecto-spytag (S-ecto-  
378 spy) trimers. HisTrap affinity purified S-ecto-spy protein from 250 ml of transfected ExpiCHO cells  
379 was loaded on Superdex 200 prep-grade SEC column. S-trimers yield was ~50 mg per 1 L culture.  
380 b. Reducing SDS-PAGE (top) and BLUE NATIVE-PAGE (bottom) patterns of SEC-purified trimer  
381 fractions. The molecular weight standards (M) in kDa are shown on the left of the gels. IMAC  
382 (Immobilized Metal Affinity Chromatography, His) fraction is the material from affinity purification  
383 of culture supernatant on a HisTrap column, which was then loaded on the SEC column. c. ELISA  
384 analysis showing binding of purified S-trimers to human ACE2 at various ACE2 concentrations.  
385

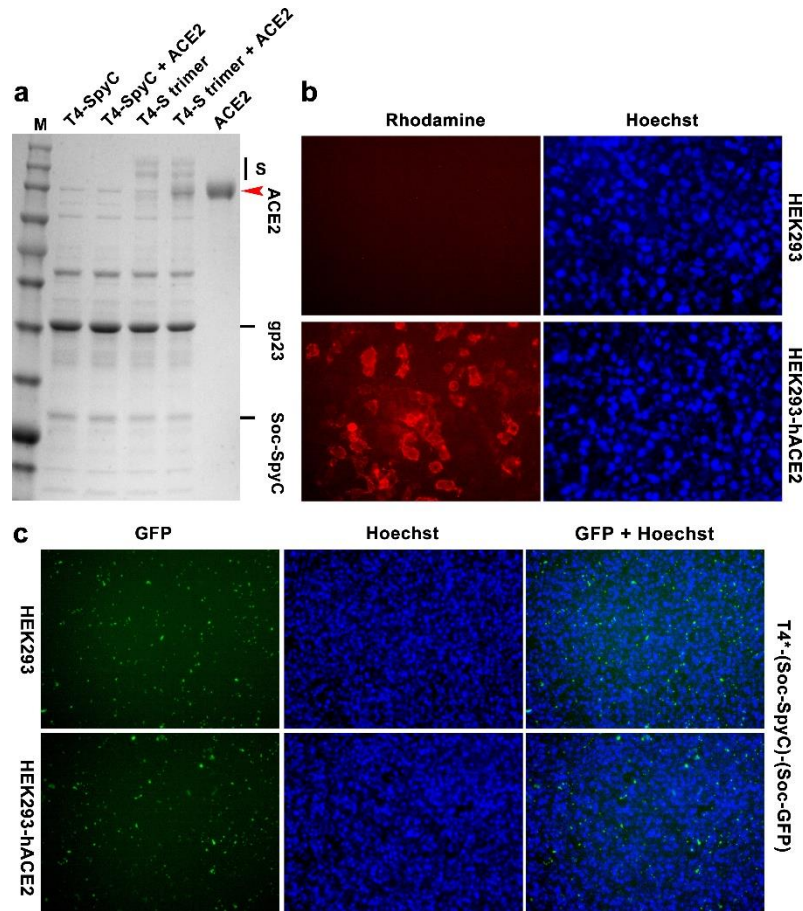

386

387 **Supplementary Fig. 7 Binding of T4 phage-decorated S-trimers to ACE2-expressing HEK**  
388 **293 cells.** **a.** Co-sedimentation assay showing the capture of ACE2 by T4 phage-decorated S  
389 trimers. T4-S-trimer particles and ACE2 were incubated at equimolar ratio for 1 hr at 4°C, followed  
390 by high speed centrifugation. After two washes, the pellet was re-suspended in buffer and SDS-  
391 PAGE was performed. Presence of ACE2 in the pellet was found with these phage particles but  
392 not with the control phage lacking S-trimers. **b.** Immunofluorescence assay showing expression  
393 of ACE2 on 293 cells. Two days after ACE2 plasmid transfection, HEK293 cells were incubated  
394 with RBD, followed by anti-RBD antibody and Rhodamine-conjugated second antibody. **c.** Lack  
395 of binding of T4-GFP control phage (without S-trimers) to ACE2-293 cells. No difference in  
396 fluorescence was observed. The nuclei were stained with Hoechst. T4\* indicates T4-(S-ecto)-  
397 RBD-NP-Ee-SocΔ.  
398

### 399 Immunogenicity and protective efficacy of T4-SARS-CoV-2 vaccine candidates

400 The T4-CoV-2 vaccine candidates generated as above by sequential engineering  
401 (Supplementary Fig. 8a,b) were screened for their immunogenicity and protective efficacy in a  
402 mouse model. BALB/c mice were immunized at weeks 0, 3, and 6 with CsCl-purified phage  
403 particles (Fig. 5a,b) and sera were analyzed by a series of immunological assays.

404 SARS-CoV-2-specific antibody titers were determined by ELISA using purified proteins (S-  
405 ecto, RBD, NP, or E) as coating antigens. Recombinant phages that delivered CoV-2 DNA alone  
406 did not induce significant titers of spike protein-specific antibodies (Fig. 5c,d, Supplementary Fig.  
407 9a to 9d). However, when the same were boosted once with phage nanoparticles displayed with  
408 S-trimers, significant antibody titers were elicited (Supplementary Fig. 10a).

409 Without any adjuvant, the T4 nanoparticles stimulated strong antibody titers to phage-  
410 delivered proteins/peptides, either displayed on surface or packaged inside. These include RBD-  
411 and spike-specific antibodies, E-specific antibodies, and NP-specific antibodies (Fig. 5c to 5f).  
412 However, the highest titers, up to an endpoint titer of  $\sim 1.5 \times 10^6$ , were obtained with phage  
413 nanoparticles decorated with S-trimers (Fig. 5c to 5f). Most of these antibodies are RBD-specific  
414 since no significant difference was observed between the endpoint titers obtained by using either  
415 RBD or S-trimers as the coating antigen (Fig 5c,d). This result is consistent with recent reports  
416 that the immunodominant RBD comprises multiple distinct antigenic sites and is the target of most  
417 neutralizing activity in COVID-19 convalescent sera<sup>42, 43</sup>.

418 Furthermore, the antibodies elicited were conformation-specific. For instance, the antibodies  
419 elicited against sRBD or rRBD displayed on phage reacted poorly with the mammalian-expressed  
420 S-trimer or RBD (Fig 5c,d), consistent with the antigenicity data described above that these also  
421 reacted poorly with ACE2 and conformation-specific mAbs (Fig. 3p, Supplementary Fig. 5e).  
422 Similarly, the antibodies elicited against T4-dispalyed S-trimers reacted poorly with the *E.coli*-  
423 produced RBD (end point titer of  $\sim 10^2$  using *E. coli* RBD as the coating antigen vs  $\sim 10^5$  using  
424 mammalian RBD) (Supplementary Fig. 10d).

425 The spike-specific titers elicited by phage-decorated trimers without any adjuvant were as  
426 high as those generated with Alhydrogel adjuvant (Fig. 5c,d,g). Furthermore, notably, IgG  
427 subclass data indicated that phage nanoparticles stimulated both humoral ( $T_H2$ ) and cellular ( $T_H1$ )  
428 arms of the immune system. In mice, IgG2a subclass represents  $T_H1$  response whereas IgG1  
429 class reflects  $T_H2$  response. The adjuvant-free T4 nanoparticles mounted high levels of both IgG1

430 and IgG2a classes against all three SARS-CoV-2 antigens; spike/RBD, E, and NP, whereas the  
431 Alhydrogel-adjuvanted trimers predominantly elicited T<sub>H</sub>2-derived IgG1 class antibodies (Fig. 5h,  
432 Supplementary Fig. 9a to 9j). In fact, the T<sub>H</sub>1-derived IgG2a antibodies were higher than the T<sub>H</sub>2  
433 derived IgG1 antibodies in T4 groups, whereas the Alhydrogel-adjuvanted mice induced  $\geq 2$  orders  
434 of magnitude lower IgG2a antibodies (Fig. 5h, Supplementary Fig. 9i,j). While T<sub>H</sub>2-biased  
435 responses may lead to lung injury via eosinophilic infiltrates, the T<sub>H</sub>1-type responses are proposed  
436 to alleviate potential lung immunopathology and reduce the potential for disease enhancement<sup>44</sup>.  
437 <sup>45</sup>. The T4 nanoparticle vaccine with a balanced T<sub>H</sub>1 and T<sub>H</sub>2 responses might therefore be  
438 optimal for safety and virus clearance. This point however requires further investigation.

439 The T4-stimulated spike-specific antibodies blocked binding of RBD to human ACE-2  
440 expressed on HEK293 cells in a dose-dependent manner (Fig. 5i, Supplementary Fig. 9k).  
441 Importantly, these antibodies also exhibited strong virus neutralizing activity as determined by  
442 Vero E6 cell cytopathic assay using the live BSL-3 SARS-CoV-2 US-WA-1/2020 strain, the first  
443 patient isolate obtained through the CDC<sup>46</sup> (Fig. 5j). The neutralization titers correlated well with  
444 protective efficacy when mice were challenged with mouse-adapted BSL-3 SARS-CoV-2 MA10  
445 virus<sup>47</sup> (Fig. 5k,l).

446 Upon challenge, the naïve and T4 control mice showed rapid decline in weight, up to 25%  
447 of their starting weight in five days due to acute viral infection, and were moribund (humanely  
448 euthanized) or succumbed to infection. After day 5, the surviving mice began to re-gain weight  
449 and recovery from infection during the next several days (Fig. 5k,l). This rapid weight loss resulted  
450 in ~80% mortality rate in the control animals (Fig. 5k,l). None of the groups receiving the spike  
451 DNA vaccine alone and/or CoV-2 antigens other than spike trimers showed significant protection,  
452 closely correlating to the lack or extremely weak neutralization antibody responses. However, *E.*  
453 *coli* RBD groups (G6 and G7) showed less weight loss and higher survival rate than the  
454 susceptible control groups (G3 and G4) (Fig. 5k,l). On the other hand, mice vaccinated with T4-  
455 decorated trimers exhibited profound neutralization antibody responses and were fully protected

456 from the acute onset of morbidity (weight loss and other signs of illness) and mortality. The weight  
457 loss, if any, was insignificant for both these groups, as well as the positive control group  
458 vaccinated with Alhydrogel-adjuvanted trimers (Fig. 5k,l). Additionally, those mice boosted with  
459 one dose of T4-trimers also showed partial protection. The weight loss was in between  
460 unprotected and protected groups, with a milder weight loss than the unimmunized and  
461 challenged controls, clearly correlating protection with spike-specific antibodies (Supplementary  
462 Fig. 10b,c).

463 Next, we evaluated the most effective T4 phage-decorated S-trimers vaccine in a second  
464 animal model, the New Zealand White rabbit (Fig. 6a). This vaccine, again without any adjuvant,  
465 by just two immunizations at days 0 and 15, elicited robust spike- and RBD-specific antibodies  
466 and virus neutralization titers in rabbits that are ~5-6 times greater than those obtained in mice,  
467 (Fig. 6b to 6d, Supplementary Fig. 11). Likewise, inclusion of displayed Ee peptide and packaged  
468 NP into the nanoparticle broadened the immune responses (Fig. 6e,f) while addition of a T<sub>H</sub>1-  
469 biased adjuvant Alhydroxyquim-II only slightly enhanced the antibody titers (Fig. 6b to 6d).

470 Together, these datasets allowed selection of a highly effective T4 phage vaccine candidate  
471 that generated robust virus neutralization titers in two different animal models, mouse and rabbit,  
472 and conferred complete protection against acute viral infection in mice.

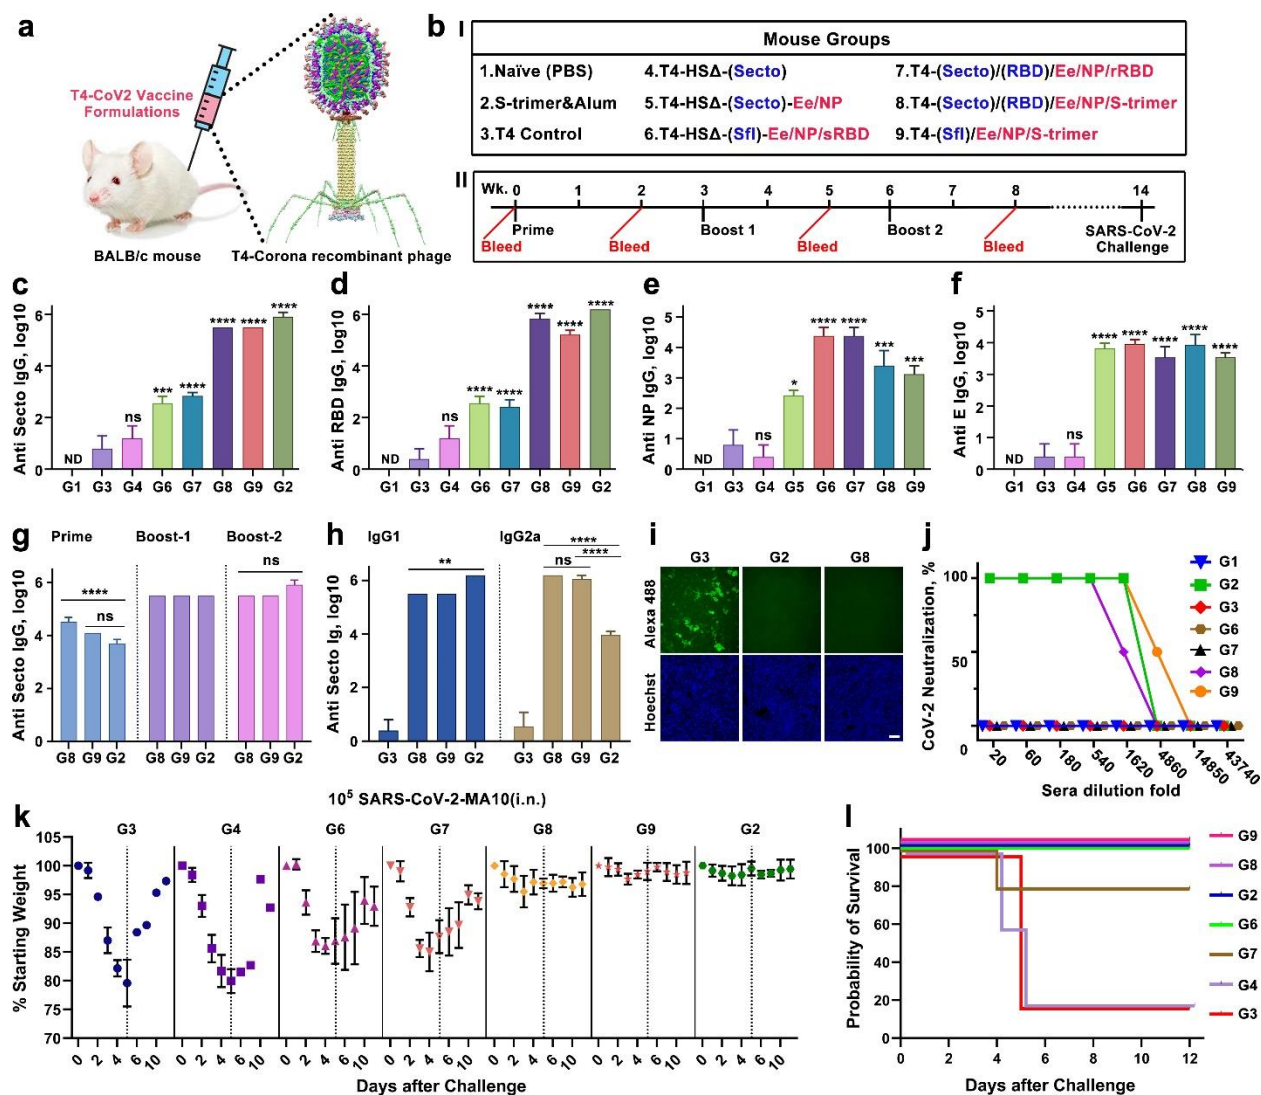

473

474 **Fig. 5 Immunogenicity and protective efficacy of T4-SARS-CoV-2 vaccine candidates in**  
 475 **mice.** **a.** Schematic diagram showing BALB/c mice immunized by the intramuscular (i.m.) route  
 476 using T4-SARS-CoV-2 vaccine formulations. **b. I.** Formulations and mouse groups used for  
 477 vaccinations. HSA $\Delta$  indicates Hoc deletion and Soc deletion. Blue color (S-ecto, S-fl, and RBD)  
 478 indicates the insertion of mammalian gene expression cassette into T4 genome as DNA vaccine.  
 479 Red color indicates the capsid-displayed Ee, S-trimers, or *E.coli*-produced rRBD or sRBD protein,  
 480 or the capsid-encapsidated NP protein. Naïve mice and mice immunized with the phage lacking  
 481 any CoV-2 genes served as negative controls whereas mice immunized with S-trimers adjuvanted  
 482 with Alhydrogel served as a positive control. **II.** Prime-boost immunization scheme. BALB/c mice  
 483 (5 per group) were immunized on weeks 0, 3, and 6 and challenged intranasally (i.n.) with a  
 484 mouse-adapted SARS-CoV-2 strain (SARS-CoV-2 MA10)<sup>47</sup> on week 14. **c** to **f.** The boost-2 sera  
 485 (week 8 bleeding) from various groups were assessed by ELISA for antigen-specific IgG antibody  
 486 titers (endpoint) against S-ecto (**c**), RBD (**d**), NP (**e**), and E (**f**). \**P* < 0.05, \*\**P* < 0.01, \*\*\**P* < 0.001,  
 487 and \*\*\*\**P* < 0.0001, compared with phage control group G3. ns, no significance, *P* > 0.05. ND,  
 488 not detected. **g.** Measurement of anti-S-ecto IgG antibody titers in sera from S-trimers-Alhydrogel  
 489 (G2) group and T4-S-trimers (G8 and G9) groups at weeks 2 (prime), 5 (boost-1), and 8 (boost-  
 490 2). \*\*\**P* < 0.001. **h.** Comparison of anti-S-ecto IgG1 and IgG2a subtype antibody titers in sera  
 491 from S-trimers-Alhydrogel (G2) group and T4-S-trimers (G8 and G9) groups at 8 weeks (boost-



492 2). \*\*P < 0.01 and \*\*\*\*P < 0.0001. **i.** Blocking of native RBD protein binding to HEK293-ACE2 by  
 493 sera from phage control group (G3), S-trimers-Alhydrogel group (G2), and T4-S-trimers group  
 494 (G8). The sera were diluted 500-fold. RBD binding to HEK293-ACE2 was detected by Alexa 488  
 495 conjugated secondary antibody (primary antibody: anti-RBD human IgG). **j.** Neutralization  
 496 antibody measurement. Infection of Vero E6 cells by SARS-CoV-2 live virus was determined in  
 497 the presence of mouse sera at a series of threefold dilutions starting from 1:20. **k.** Percentage  
 498 starting body weight of immunized mice at days post infection with 10<sup>5</sup> PFU SARS-CoV-2 MA10  
 499 (i.n.). Dotted line represents percentage starting weight at day 5 post infection, in which mice  
 500 showed maximum weight loss in control groups. In groups G3 and G4, only 20% of mice survived  
 501 after day 5. Thus, data presented after day 5 are biased toward minor survivors. The data were  
 502 presented as means ± SD. **l.** Survival rate of mice against SARS-CoV-2 MA10 challenge.

503

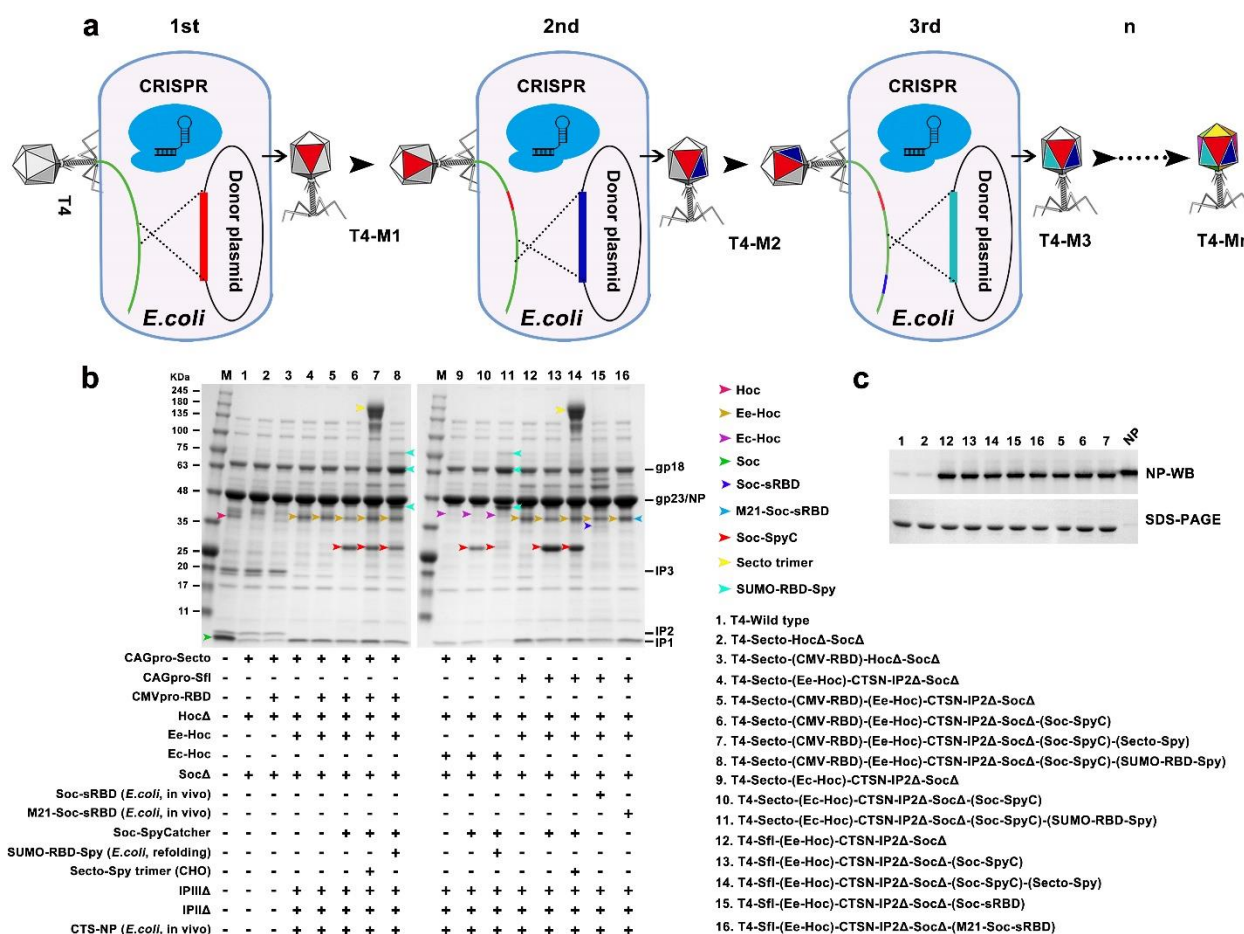

504

505 **Supplementary Fig. 8 A pipeline of SARS-CoV-2 vaccine candidates generated by**  
 506 **sequential CRISPR engineering.** **a.** Schematic showing a representative sequence in which the  
 507 WT phage was used as a starting infection of CRISPR *E. coli* containing spacer 1 and donor 1.  
 508 The resultant T4-mutant 1 (T4-M1) was used to infect bacteria containing spacer 2 and donor 2  
 509 to produce recombinant T4-mutant 2 (T4-M2) which has two insertion/deletion mutations, and so  
 510 forth. By sequential CRISPR engineering and simple phage infections, recombinant phages with  
 511 multiple desired mutations were created. Each color on phage capsid here represents a mutation.  
 512 **b.** One example of sequential phage CRISPR engineering for creating the T4-SARS-CoV-2  
 513 nanovaccine. Numerous CoV-2 components, including CAGpromoter-S-ecto insertion,  
 514 CAGpromoter-S-fl insertion, CMVpromoter-RBD insertion, Hoc deletion, Ee-Hoc insertion, Ec-  
 515 Hoc insertion, Soc deletion, Soc-sRBD display, M21-Soc-sRBD display, Soc-SpyCatcher display,

516 refolding SUMO-RBD-Spy display, S-trimer display, IPIII deletion, IPII deletion, and NP  
 517 encapsidation, were permuted and combined as needed. The resultant SARS-CoV-2 vaccine  
 518 candidates were characterized by PCR, DNA sequencing and/or SDS-PAGE, and some of these  
 519 were then tested in a mouse study. M21 indicates a potential T cell 21 aa epitope  
 520 (SYFIASFRLFARTRSMWSFNP) from SARS-CoV-2 membrane protein. **c.** WB showing NP  
 521 protein encapsidation in the phages containing CTSam-NP insertion at IPIII deletion site.  
 522

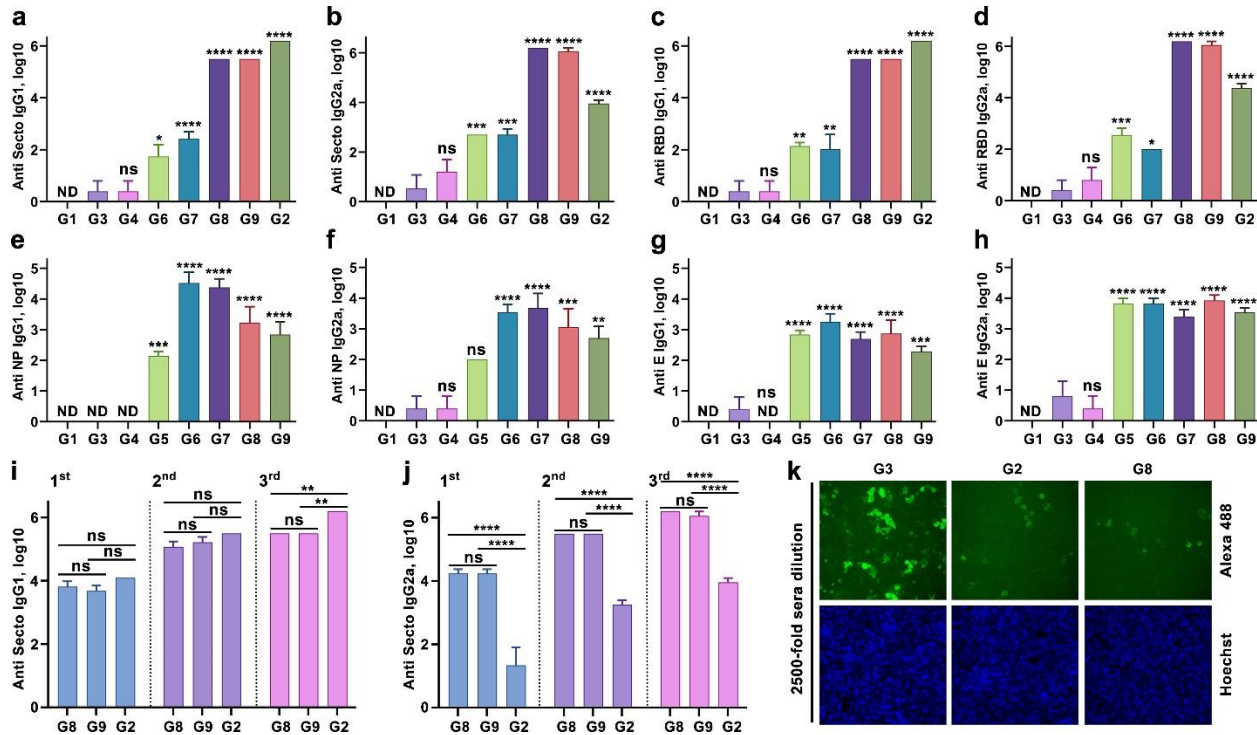

523  
 524 **Supplementary Fig. 9 Serum antibody responses in various T4-SARS-CoV-2 immunized**  
 525 **mice. a and b.** Anti-S-ecto IgG1 (a) and IgG2a (b) antibody titers in the boost-2 sera (week 8  
 526 bleeding) from various groups. **c and d.** Anti-RBD IgG1 (c) and IgG2a (d) antibody titers in the  
 527 boost-2 sera. **e and f.** Anti-NP IgG1 (e) and IgG2a (f) antibody titers in the boost-2 sera. **g and h.**  
 528 Anti-E IgG1 (g) and IgG2a (h) antibody titers in the boost-2 sera. \*P < 0.05, \*\*P < 0.01, \*\*\*P <  
 529 0.001, and \*\*\*\*P < 0.0001, compared with phage control group G3. ns, no significance, P > 0.05.  
 530 ND, not detected. **i and j.** Anti-S-ecto IgG1 (i) and IgG2a (j) antibody titers in the sera from S-  
 531 trimer & Alhydrogel (G2) group and T4-S-trimer (G8 and G9) groups at 2 weeks (prime), 5 weeks  
 532 (boost-1), and 8 weeks (boost-2). \*\*P < 0.01 and \*\*\*\*P < 0.01. **k.** Blocking of native RBD protein  
 533 binding to HEK293-ACE2 by 2500-fold diluted sera. Sera from phage control group (G3), S-  
 534 trimers-Alhydrogel group (G2), and T4-S-trimers group (G8) were compared. The RBD binding to  
 535 ACE2 was detected by Alexa 488 conjugated secondary antibody.  
 536

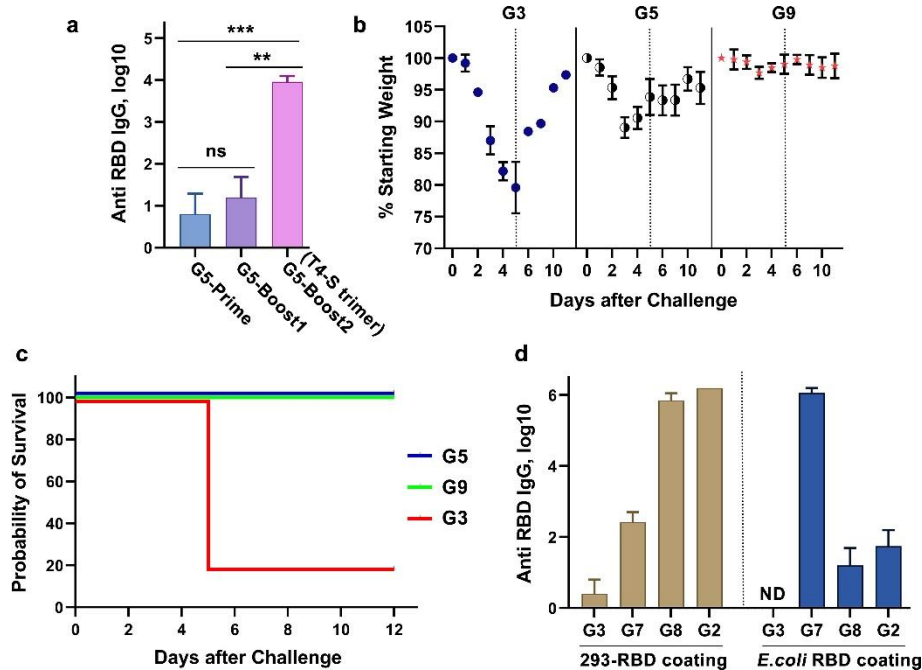

537

538 **Supplementary Fig. 10 Immune responses of T4-SARS-CoV-2 immunized mice.** **a.** Anti-RBD  
 539 IgG antibody titers in the sera from group G5 (T4-Hoc $\Delta$ -Soc $\Delta$ -S-ecto-Ee-NP) at weeks 2 (prime),  
 540 5 (boost-1), and 8 (boost-2). For boost-2, T4-S-trimers particles were used. \*\* $P < 0.01$  and \*\*\* $P$   
 541  $< 0.001$ . **b.** Body weight of immunized mice from groups G3 (phage control), G5 (T4-S DNA plus  
 542 T4-S-trimers boost-2), and G9 (T4-S-trimers) at days post-challenge with  $10^5$  pfu of SARS-CoV-  
 543 2 MA10 virus (intranasal inoculation). **c.** Survival rate of groups G3, G5, and G9 after virus  
 544 challenge. **d.** Comparison of anti-RBD IgG antibody titers by ELISA using HEK293-produced RBD  
 545 or *E. coli*-produced RBD as coating antigens in groups G3 (phage control), G7 (rRBD displayed  
 546 T4), G8 (T4-S-trimers), and G2 (S-trimers-Alhydrogel).  
 547

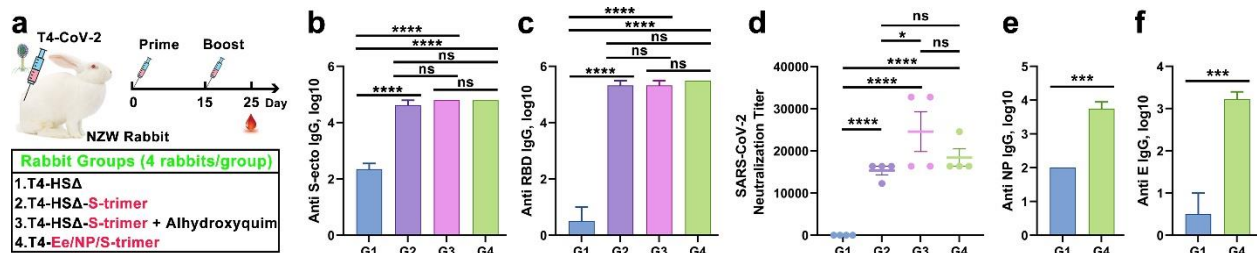

548

549 **Fig. 6 Immunogenicity and virus neutralization responses of the T4-S-trimers vaccine in**  
 550 **New Zealand White rabbit model.** **a.** Schematic diagram showing formulations, groups, and  
 551 prime-single boost immunization scheme for intramuscular vaccinations of New Zealand White  
 552 (NZW) rabbits. HSA indicates Hoc deletion and Soc deletion recombinant phage. Red color  
 553 indicates the capsid-displayed Ee, S-trimers, or the capsid-encapsidated NP protein. Rabbits  
 554 immunized with HSA phage served as negative control. **b** and **c.** boost sera (10 days after boost)  
 555 were assessed by ELISA for antigen-specific IgG antibody titers against S-ecto (**b**) and RBD (**c**).  
 556 \*\*\*\* $P < 0.0001$ . ns, no significance,  $P > 0.05$ . **d.** Serial dilutions of serum from immunized rabbits  
 557 were assessed for neutralization of live BSL-3 strain SARS-CoV-2 US-WA-1/2020. Neutralization  
 558 titers were calculated as the reciprocal dilution where infection (cytopathic effect) was reduced by  
 559 more than 90% relative to infection in the absence of serum. **e** and **f.** Comparison of G1 (control

560 phage) and G4 (Ee-NP-S trimer displayed phage) for anti-NP (e) and anti-E (f) IgG antibody titers.  
561 \*\*\*P < 0.001.  
562

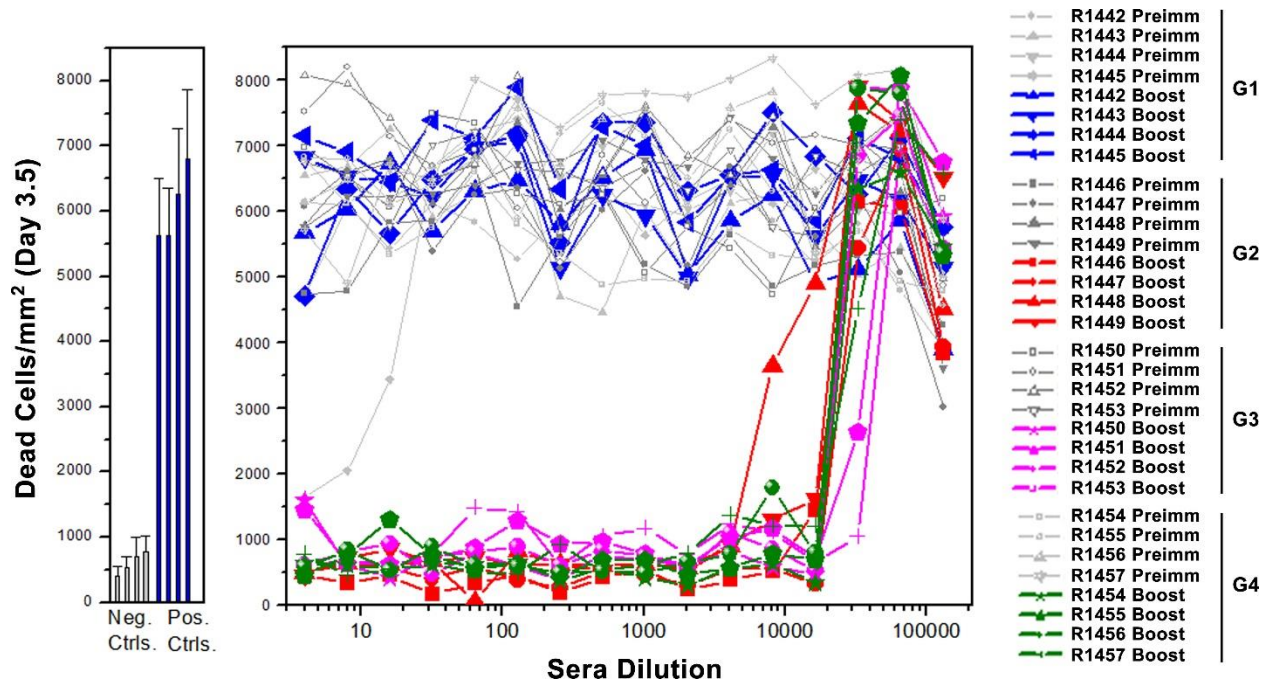

563

564 **Supplementary Fig. 11 Virus neutralization titers of rabbit sera.** Infection of Vero E6 cells by  
565 live SARS-CoV-2 US-WA-1/2020 was determined in the presence of rabbit sera at a series of  
566 two-fold dilutions starting from 1:4. Culture medium only and CoV-2 virus only were used as  
567 negative and positive controls, respectively. R1442 to R1457 refer to tag numbers of rabbits. The  
568 data in control groups were presented as means  $\pm$  SD of 32 wells. The data in rabbit sera groups  
569 were shown as means of duplicates.  
570

570

## 571 Discussion

572 We have developed a “universal” vaccine platform centered around bacteriophage T4  
573 nanoparticle and CRISPR engineering (Figure 1; Video). A number of special features  
574 demonstrated here would make this a powerful platform to rapidly generate vaccine candidates  
575 against any emerging and pandemic pathogen in the future.

576 First, a series of recombinant phages containing SARS-CoV-2 gene insertions were created  
577 in days, by CRISPR genome engineering using a combination of type II Cas9 and type V Cpf1  
578 nucleases. This combination provided built-in choices for spacers as well as for efficient cleavage  
579 of T4 genome that is extensively modified by cytosine hydroxymethylation and glycosylation, to  
580 attain near 100% success<sup>21, 22</sup>.

581           Second, a large amount of genetic and structural space available in phage T4<sup>35</sup> was  
582 exploited to incorporate payloads containing CoV-2 DNAs, peptides, proteins, and/or complexes  
583 into the same nanoparticle. For instance, we have inserted ~6.5 kb full-length spike gene  
584 expression cassette, 2.7 kb RBD gene expression cassette, and 1.3 kb nucleocapsid gene into  
585 the same genome by replacing nonessential genetic material of T4. It was further expanded by  
586 inserting Hoc and Soc fusions, and/or replacing additional nonessential segments that span  
587 across the phage genome. In addition, up to 155 copies of a 12-aa Ee peptide and ~100 copies  
588 of 433-kDa S-trimers were displayed on the same nanoparticle while ~70 molecules of 50-kDa  
589 NP were co-packaged with genome core. These represent unprecedented engineering capability  
590 and payload complexity by a vaccine delivery vehicle.

591           Third, different compartments of phage nanostructure were utilized for placing different  
592 vaccine cargos. The tips of Hoc fibers with ~170Å reach were used to display short 12-aa Ee  
593 peptide epitopes as this would allow efficient capture by antigen presenting cells, and B and T  
594 cells<sup>29</sup>. Indeed, these elicited strong antibody titers. At the same time, NP was co-packaged with  
595 genome as this mimics NP's natural nucleic acid environment<sup>2, 37</sup>.

596           Fourth, the T4 platform was readily adapted to mammalian-expressed proteins through  
597 highly efficient SpyCatcher-SpyTag bridging<sup>39</sup>. This might be essential for proper folding and  
598 glycosylation of some pathogen antigens, as in the case of spike trimers<sup>30</sup>. As the Cryo-EM  
599 images showed, such spikes anchored to capsid mimic the spikes on SARS-CoV-2 virion<sup>41</sup>  
600 providing a native-like context for stimulating effective immune responses.

601           Fifth, alternative strategies such as pre-expression from a plasmid and display through  
602 subsequent phage infection provided additional advantages to enhance copy number and better  
603 control over folding. As demonstrated, this approach yielded 3-6-fold higher copy number of Soc-  
604 SpyCatcher on phage capsid. However, the hydrophobic RBD remained poorly folded.

605           Sixth, our sequential engineering generated a pipeline of SARS-CoV-2 vaccine candidates  
606 in mere weeks, and allowed down-selection of the best vaccine candidate, the phage-decorated

607 trimers, in a single mouse experiment. However, why the DNA-alone vaccines failed to elicit  
608 immune responses remains unclear and requires further investigation.

609 Seventh, unlike the DNAs, all the phage-delivered peptides/proteins, whether displayed on  
610 surface or packaged inside, generated robust immune responses. The strong virus neutralization  
611 titers and ACE-2 blocking titers elicited by T4-delivered trimers in two different animal models,  
612 mouse and rabbit, are particularly noteworthy. These responses correlated with protective efficacy  
613 where the vaccinated mice were completely protected from acute viral infection.

614 Eighth, T4 nanoparticle vaccines generated balanced  $T_H1$  and  $T_H2$  derived antibody  
615 responses against all three CoV-2 antigens tested. In fact, T4 seems to have a slight  $T_H1$ -bias.  
616 These are desirable properties for protection and distinguish this PAMP-like T4 platform from  
617 other subunit vaccine platforms and adjuvant systems<sup>28, 29, 48, 49</sup>.

618 Ninth, the T4 nanoparticle vaccine does not require any adjuvant to stimulate robust anti-  
619 CoV-2 immune responses, as demonstrated in two animal models. In addition to reducing cost  
620 and manufacturing complexity, the adjuvant-less T4 vaccine formulations might provide a safe  
621 alternative because reactogenicity to vaccines is often associated with chemical adjuvants used  
622 in traditional vaccine formulations. In numerous immunizations with T4 phage, in a variety of  
623 animal models including mouse, rat, rabbit, and macaque, no significant adverse reactions were  
624 noted<sup>28, 48-50</sup>.

625 Finally, our best T4 vaccine candidate elicited, in addition to spike-specific antibodies, broad  
626 antibody responses against two additional virion components, E that is exposed on the surface  
627 and NP that is abundantly present on SARS-CoV-2 infected host cells<sup>32, 33</sup>. Furthermore, the  
628 spycatcher phage could serve as a “plug-and play” backbone to capture ectodomain trimers from  
629 other coronaviruses such as SARS-CoV-1 and MERS<sup>2</sup>, or any spycatcher antigen(s) from other  
630 infectious agents. Thus, it is conceivable that different vaccine formulations can be “created” at  
631 the site of administration by mixing the spycatcher T4 phage with the desired antigen(s)  
632 combinations. Co-carrying multiple and distinct antigens in the same formulation increase the

633 breadth of immune responses<sup>51, 52</sup> and since regions of S-ecto, Ee, and NP are conserved in other  
634 coronaviruses<sup>1, 2</sup>, the T4 vaccine platform might be considered for expanded protection.

635 In conclusion, we have developed a versatile “universal” nanovaccine design template by  
636 which vaccine candidates can be rapidly generated, evaluated in animal models, and transitioned  
637 to human clinical trials as is being done currently with the T4-CoV-2 vaccine. As T4 is a highly  
638 stable nanoparticle, has good safety profile, and can be manufactured at a relatively low cost, it  
639 provides a robust platform to rapidly generate effective vaccines against any epidemic or  
640 pandemic pathogen in the future, particularly when multivalent vaccines are essential to protect  
641 global communities.

642

## 643 **Acknowledgments**

644 We thank Dr. Victor Padilla-Sanchez and Frontera Supercomputer in Texas for assistance with  
645 the preparation of the video and Figure 1, Drs. Zhiqing Wang and Thomas Close at Purdue  
646 University for the Cryo-electron microscopy images, Drs. Barney Graham and Kizzmekia S.  
647 Corbett, (National Institutes of Health), and Jason S. McLellan (University of Texas, Austin) for  
648 providing recombinant plasmids containing SARS-CoV-2 Spike (S) genes, and Dr. Rayavara  
649 Kempaiah (UTMB) for providing the inoculum of the mouse-adapted SARS-CoV2 virus.

650 Funding: This research was supported by NIAID/NIH supplement grant 3R01AI095366-07S1  
651 (subaward: 1100992-100) and in part by NIAID/NIH grants AI111538 and AI081726 and National  
652 Science Foundation grant MCB-0923873 to V.B.R. ViroVax LLC gratefully acknowledges the  
653 NIAID/NIH Supplement contract HHSN272201800049C to S.A.D. Special funding provided by the  
654 IHII-COVID19 pilot grant to A.K.C. is greatly acknowledged.

655

## 656 **Author contributions**

657 V.B.R. designed and directed the project. J.Z. and V.B.R. designed research. J.Z., N.A., S.J.,  
658 H.B., W-C.T. conducted most of the experiments. D.A.L, M.L.R., and S.A.D. performed the rabbit

659 immunization and neutralization antibody titer assay. A.D. performed neutralization assay using  
660 the live virus with immune sera derived from mice. A.K.C. conducted mice challenge and  
661 neutralization titer assay. J.Z. and V.B.R. analyzed and interpreted the data. V.B.R. and J.Z. wrote  
662 the manuscript.

## 663 664 **Competing interests**

665 The authors declare no competing interests.

## 666 667 **Methods**

### 668 **DNA, bacteria, and bacteriophages**

669 The expression vector pET28b (Novagen, MA) was used for donor plasmid construction and  
670 protein expression plasmid construction. The spacer plasmids LbCpf1 and SpCas9 were  
671 constructed as described previously<sup>21, 22</sup>. The DNA fragments containing NP and RBD were  
672 codon-optimized for *E.coli* expression and synthesized by GeneArt (Thermo Fisher). The  
673 plasmids containing wild-type (WT) SARS-CoV-2 Spike (S) gene and S-ecto-6P gene were  
674 provided by Drs. Barney Graham, and Kizzmekia S. Corbett (National Institutes of Health), and  
675 Dr. Jason S. McLellan (University of Texas, Austin), respectively. The RBD gene for mammalian  
676 expression was amplified from the WT Spike (S) gene. SpyCatcher/Spy-tag and SUMO  
677 containing plasmids were purchased from Addgene (#133449 and #111560).

678 *E. coli* DH5α [*hsdR17* (*rK-mK+*) *sup*<sup>2</sup>] (NEB) was used for all the clone constructions. The *E.*  
679 *coli* BL21-CodonPlus (DE3)-RIPL (Novagen, MA) was used for the expression of recombinant  
680 proteins. *E. coli* P301 (*sup*<sup>0</sup>) and *E. coli* B834 (*hsdRB hsdMB met thi sup*<sup>0</sup>) were used for the  
681 propagation and recombination of phages without amber mutations. The *E. coli* BL21 (DE3) RIPL  
682 transformed with amber-suppressor-1 plasmid and *E. coli* B40 (*sup*<sup>1</sup>) were used for propagation  
683 and recombination of phages with amber mutations (CTS-amber-NP). WT T4 phage was  
684 propagated on *E.coli* P301 or B834 and used as a starting phage for CRISPR engineering.

### 685 **Plasmid construction**

686 CRISPR-LbCpf1/SpCas9 plasmid was constructed based on the streptomycin-resistant plasmid  
687 DS-SPCas (Addgene no. 48645) as described previously<sup>21, 22</sup>. The spacer containing fragments  
688 were prepared by annealing and extension of two amplified DNA fragments containing 26 bp  
689 complementary nucleotides (overlap extension PCR). The spacer fragment digested with  
690 restriction enzymes XhoI and EagI was cloned into linearized LbCpf1/SpCas9 plasmid.  
691 Sequences of the spacers are shown in Supplementary Table.

692 The donor plasmids for deletion/insertion, including Hoc-del, Soc-del, FarP7K-del, FarP18K-del,  
693 39-56 11K-del, SegF-del, IPIII-del, IPII-del, E insertion (Hoc site), Soc-SpyCatcher/RBD insertion  
694 (Soc site), CTS-amber-NP insertion (IPIII site), CAG-S-fl/S-ecto insertion (FarP7K site), and CMV-  
695 RBD insertion (SegF site), were constructed using overlap extension PCR. Briefly, the DNAs  
696 including ~500 bp homology arms (left and right) with a desired deletion in the middle were  
697 amplified from T4 genome DNA, stitched, and cloned into pET28b linearized with BglII and XhoI



698 to generate the deletion donor plasmid. For the insertion donor plasmid, the insertion fragment,  
699 left homology arm, and right homology arm, which contains 25 bp complementary nucleotides  
700 were stitched by annealing and overlap extension. The BglIII and XhoI digested donor fragment  
701 was cloned into pET28b plasmid.

702 The Soc-fusion expression plasmids, including Soc-SpyCatcher, Soc-RBD, RBD-Soc, SUMO-  
703 Soc-Spy, and Soc-truncated RBDs (RBD67, RBD106, RBD135, RBD162, RBD181, and RBD197),  
704 were constructed by two rounds of cloning. First, the multiple cloning site (MCS) (NcoI, NdeI, NheI,  
705 and BmtI)-linker (4GGS)-Soc-linker (2GGGGS)-MCS (HindIII, EagI, NotI, and XhoI) was amplified  
706 using Soc-plasmid template and cloned into the pET28b DNA linearized with NcoI and XhoI  
707 restriction enzymes to generate pET28b-MCS-L-Soc-L-MCS. Second, DNAs corresponding to  
708 SpyCatcher, SUMO, Spy, and various RBDs were amplified and inserted to 3'- or 5'- MCS of  
709 pET28b-MCS-L-Soc-L-MCS as needed. CTS-NP and Ee-Hoc expression fragments were  
710 amplified using synthesized NP and T4 genomic DNA respectively, and cloned into NcoI and  
711 XhoI-linearized pET28b.

712 The plasmids for expression in mammalian cells, including pCMV-CD5-RBD, pCAG-CD5-S-fl,  
713 pCAG-CD5-S-ecto-6P, and pCAG-CD5-S-ecto-6P-Spytag, were constructed using standard  
714 protocols. The RBD fragment was amplified using the WT spike gene, and CD5 secretion leading  
715 peptide (MPMGSLQPLATLYLLGMLVASVLA) was added to the N terminus of RBD by PCR. The  
716 CD5-RBD was directionally cloned into pAAV vector (Cell Biolabs) using the HindIII and XhoI  
717 restriction enzyme sites (pCMV-CD5-RBD). For the construction of pCAG-CD5-S-fl, pCAG-CD5-  
718 S-ecto-6P, and pCAG-CD5-S-ecto-6P-Spytag, plasmids pCAG-S-fl and pCAG-S-ecto-6P were  
719 used as template and backbone. The CD5 fragment was cloned into N terminus of S-fl or S-ecto-  
720 6P using KpnI and EcoRI restriction sites. Similarly, Spytag (RGVPHIVMVDAYKRYK) was cloned  
721 into the C terminus of S-ecto using BamHI and XhoI restriction sites. All the constructed plasmids  
722 were sequenced to confirm 100% accuracy of the recombinant fragment (Retrogen, CA).

## 723 **Plaque assay**

724 Plaque assays were performed to determine the efficiency of the individual spacers to restrict T4  
725 phage infection. The CRISPR-Cpf1/Cas9 spacer plasmid was transformed into *E. coli* strains  
726 B834 or B40. Serially diluted T4 phages, in the range of  $10^1$  to  $10^7$  plaque forming units (pfu) in  
727 100  $\mu$ l Pi-Mg buffer (26 mM  $\text{Na}_2\text{HPO}_4$ , 68 mM NaCl, 22 mM  $\text{KH}_2\text{PO}_4$ , 1 mM  $\text{MgSO}_4$ , pH 7.5), were  
728 mixed with 350  $\mu$ l of spacer-containing *E. coli* ( $\sim 10^8$  cells/ml). *E. coli* cells without spacer were  
729 used as a control. After incubation at 37°C for 7 min, 3.5 ml of 0.75% top agar with spectinomycin  
730 (50  $\mu$ g/ml) was added to each tube, mixed, and poured onto LB plate. The plates were incubated  
731 at 37°C overnight to allow the formation of plaques. The pfu were counted on each plate and the  
732 efficiency of plating (EOP) was determined by dividing the pfu produced from infection of *E. coli*  
733 containing a spacer with the input pfu.

## 734 **CRISPR-mediated phage T4 genome editing and recombination**

735 The CRISPR-Cpf1/Cas9 spacer plasmid and the corresponding donor plasmid were co-  
736 transformed into *E. coli* strains, either B834/P301 without amber suppressor, or B40/RIPL with  
737 amber suppressor. *E. coli* cells transformed with single plasmids, either the donor plasmid or the  
738 CRISPR spacer plasmid, were used as controls. An appropriate amount of T4 phages, as  
739 determined by the EOP as described above, were added to *E. coli* and incubated for 7 min at  
740 37°C. After adding 3.5 ml of 0.75% top agar containing 50  $\mu$ g/ml spectinomycin and 50  $\mu$ g/ml  
741 kanamycin, the infection mixture was poured onto LB plate and incubated overnight. Single  
742 plaques, namely Generation 1 (G1), were picked using a sterile Pasteur glass pipet and  
743 transferred into a 1.5 ml Eppendorf tube containing 200  $\mu$ l of Pi-Mg buffer. After 20 min incubation  
744 at room temperature with gentle vortexing every 5 min, serially diluted G1 phages were used to

745 infect spacer-containing *E. coli* cells (50 µg/ml spectinomycin). This eliminated any parental phage  
746 background under CRISPR pressure. The resultant single G2 plaques were picked and used to  
747 infect *E. coli* cells (without spacer or donor) to produce purified G3 phages. Single G3 plaques  
748 were then picked into 200 µl of Pi-Mg buffer. PCR analysis was performed to confirm DNA deletion  
749 or foreign gene insertion. One microliter of G3 phages were denatured at 94°C for 8 min and used  
750 as a template for PCR using Phusion High-Fidelity PCR Master Mix (Thermo Fisher). The  
751 amplified DNA fragment was purified using QIAquick Gel Extraction Kit (Qiagen) and sequenced  
752 (Retrogene). The G3 phages in which the recombinant DNA sequence was confirmed with 100%  
753 accuracy were selected and a few drops of chloroform were added. These plaque-purified “zero  
754 stocks” were stored at 4°C. More rounds of CRISPR gene editing were similarly introduced into  
755 the same phage as needed as described above.

## 756 **Phage production and purification**

757 *E. coli* strains B40 or B834 were used for the production of amber-phage or non-amber-phage,  
758 respectively. Fresh overnight *E. coli* cells were inoculated in 1 L of Moore’s media (20 g tryptone,  
759 15 g yeast extract powder, 2 g dextrose, 8 g NaCl, 2 g Na<sub>2</sub>HPO<sub>4</sub>, 1 g KH<sub>2</sub>PO<sub>4</sub>, dissolved in 1 L  
760 MQ water) at 1/50 dilution, and then grown at 37°C for 2-2.5 hr in a shaker incubator at 200 RPM.  
761 When the cells reached a density of ~4 X 10<sup>8</sup>/ml, phages were added at a multiplicity of infection  
762 (MOI) of 0.5. The infection mixture was cultured at 37°C, 200 RPM, for another 2.5 -3 hr and  
763 periodically checked under the microscope. As the cells get infected with phage, the shape of  
764 cells change from long bacilli to short dumbbell shape. When the cell number started dropping,  
765 the culture was transferred to Sorvall GSA bottle and centrifuged at 27, 504 g for 1 hr at 4 °C. The  
766 supernatant was discarded, and the pellet was resuspended in 50 ml Pi-Mg buffer containing 10  
767 µg/ml DNase I (or Benzonase) and one tablet of protease inhibitor cocktail. The resuspended  
768 pellet was added with 5 ml chloroform and incubated at 37°C for 1 hr to lyse the bacteria and  
769 release the phage. The debris was removed by low-speed centrifugation at 4,302 g for 10 min.  
770 The phage-containing supernatant was transferred to a sterile falcon tube and the pellet was  
771 discarded. The titer of this phage stock was determined using *E. coli* B40 or B834. The working  
772 stock of phages can be stored at 4°C for long periods of time with a few drops of chloroform added  
773 to prevent microbial contamination, or used as seed phage to make SpyCatcher or Soc-RBD  
774 displayed phage, or purified as a vaccine candidate for animal studies.

775 For purification of phage, ~50 ml phage stock was distributed into 5 Corex glass tubes (10 ml  
776 each) and sealed with parafilm. The phage stock was centrifuged at 34,540 g for 1 hr using a  
777 Sorvall SS34 rotor. The supernatant was discarded and the phage-containing pellet was  
778 resuspended with 1-3 ml Pi-Mg buffer plus 5 µl Benzonase overnight at 4°C. Next, the  
779 resuspended phages were loaded onto a CsCl gradient and centrifuged at 152,000 g for 1 hr in a  
780 Beckman ultracentrifuge using a SW 55Ti swinging bucket rotor. The purified phage band  
781 localized between CsCl densities 1.46 and 1.55 was collected by inserting a syringe right below  
782 the phage band and aspirating the band. The phages were dialyzed in high-salt Tris-Mg buffer  
783 (10 mM Tris-HCl, pH 7.5, 200 mM NaCl, 5 mM MgCl<sub>2</sub>) for 4 hr followed by low-salt Tris-Mg buffer  
784 (10 mM Tris-HCl, pH 7.5, 50 mM NaCl, 5 mM MgCl<sub>2</sub>) overnight. The second-round CsCl  
785 centrifugation and dialysis of purified phages were applied to obtain purer phages. Two-round-  
786 CsCl-purified phages were further purified by passing through a 0.22 µm filter to remove any  
787 minor bacterial contaminants. The phage concentration and copy numbers of displayed antigens  
788 were quantified by 4-20% SDS–polyacrylamide gel electrophoresis (SDS-PAGE).

## 789 **Production of Soc-SpyCatcher and Soc-RBD displayed phages**

790 *E.coli* BL21 (DE3) RIPL transformed with T7-Soc-Spycatcher (or Soc-RBD) plasmid were used  
791 for Soc-Spycatcher (or Soc-RBD) *in vivo*-displayed phage production. *E.coli* BL21 (DE3) RIPL co-  
792 transformed with T7-Soc-Spycatcher (or Soc-RBD) plasmid and amber suppressor plasmid was

793 used for the production of Soc-Spycatcher (or Soc-RBD) displayed and NP protein packaged  
794 phage. Briefly, the RIPL cells were inoculated into 1 L of Moore's Media at 1/50 dilution with  
795 appropriate antibiotics (RIPL-Soc-Spycatcher: 50 µg/ml Kanamycin+ 37 µg/ml Chloramphenicol;  
796 RIPL-Soc-Spycatcher-Amber Suppressor: 50 µg/ml Kanamycin + 37 µg/ml Chloramphenicol +  
797 100 µg/ml Ampicillin). The culture was incubated at 37°C, 200 RPM, for 2.5-3 hr. When the cells  
798 reached a density of  $\sim 4 \times 10^8$ /ml, 0.5 mM IPTG was added for induction of recombinant protein  
799 expression. At 10 min post IPTG addition, the corresponding phages (Hoc-del/Soc-del/IPII-  
800 del/IPIII-del) were added to infect cells at an MOI of 0.5. The culture was further incubated at  
801 37°C, 200RPM, for 3 hr. The following phage production and purification procedures are the same  
802 as described above.

### 803 **S-trimer expression and purification**

804 Plasmid pCAG-CD5-S-ecto-6P-Spytag was transiently transfected into ExpiCHO cells using  
805 ExpiFectamine CHO transfection kit (Thermo Fisher). After 18-22 hr of transfection, cells were  
806 supplemented with ExpiCHO Feed and Enhancer and grown at 32°C according to the  
807 manufacturer's High Titer protocol. Cultures were harvested 8-10 days after transfection by  
808 centrifuging the cells at 3000 g for 20 min at 4°C. The supernatant was clarified through a 0.22  
809 µm filter and then loaded on a HisTrap HP column (Cytiva) previously equilibrated with wash  
810 buffer (50 mM Tris-HCl, pH 8.0, containing 300 mM NaCl and 20 mM imidazole), at a flow rate of  
811 1 ml/min, using AKTA Prime-Plus liquid chromatography system (GE Healthcare). Protein-bound  
812 column was washed with wash buffer until the UV absorbance reached the baseline to remove  
813 non-specifically bound proteins. The trimers were eluted using a 20 mM-300 mM linear gradient  
814 of imidazole. HisTRAP eluted peak fractions were pooled and applied to a Hi-Load 16/600  
815 Superdex-200 (preparation grade) size-exclusion column (GE Healthcare) equilibrated with the  
816 gel filtration buffer (50 mM Tris-HCl, pH 8, 150 mM NaCl) to obtain purified trimers, using the  
817 AKTA FPLC system. Eluted fractions were collected, filtered through 0.22 µm filter unit, flash-  
818 frozen, and stored at -80 °C until use.

### 819 **Quantification of S-trimer and rRBD display on T4-SpyCatcher phage.**

820 *In vitro* display of S-trimer/rRBD on the T4-SpyCatcher phage was assessed by co-sedimentation  
821 as described previously with some modifications<sup>27, 28</sup>. Briefly, two-round CsCl purified and 0.22  
822 µm filtered phage particles were sedimented for 45 min at 34,000 g in Protein-LoBind Eppendorf  
823 tubes, washed twice with sterilized phosphate-buffered saline (PBS) buffer (pH 7.4), and  
824 resuspended in PBS buffer (pH 7.4). S-trimer/rRBD was sedimented for 25 min at 34,000 g to  
825 remove any possible aggregates present in the sample. T4-SpyCatcher phages were incubated  
826 with S-trimer/rRBD proteins at 4°C for 1 hr. The mixtures were sedimented by centrifugation at  
827 34,000 g for 45 min, and unbound protein in the supernatants was removed. After washing twice  
828 with excess PBS to further remove the unbound protein and any other minor contaminants, the  
829 phage pellets containing the displayed proteins were incubated at 4°C overnight and then  
830 resuspended in PBS. For rabbit animal studies, fifty microliters of phage-trimer particles were  
831 added to blood agar (TSA with sheep blood) to examine any contamination of a wide variety of  
832 fastidious microorganisms. The resuspended pellets were analyzed using Novex 4-20% SDS-  
833 SDS-PAGE mini gel (Thermo Fisher Scientific, Waltham, MA) to quantify the S trimer/rRBD copies.  
834 After Coomassie Blue R-250 (Bio-Rad, CA) staining and destaining, the protein bands on SDS-  
835 PAGE gels were scanned and quantified by ChemiDoc MP imaging system (BioRad) and image  
836 J. The copy numbers of SpyCatcher and displayed S-trimer/rRBD molecules per capsid were  
837 calculated using gp23 (major capsid protein; 930 copies) or gp18 (major tail sheath protein; 138  
838 copies) as internal controls and S-trimer protein standard.

### 839 **SUMO-RBD-spy protein expression and purification.**

840 The *E.coli* expression, denaturation, refolding, and purification of SUMO-RBD-Spy (rRBD) were  
841 performed using a similar procedure described previously<sup>53</sup>. Briefly, the BL21-CodonPlus (DE3)-  
842 RIPL cells containing PET28b-SUMO-RBD-Spy expression plasmid were induced with 0.5 mM  
843 isopropyl--D-1-thiogalactopyranoside (IPTG) for 3 h at 28°C. Cells were harvested and  
844 resuspended in buffer A (20 mM Tris-HCl, 500 mM NaCl, 5 mM imidazole, 5 mM  $\beta$ -  
845 mercaptoethanol, pH 7.9) containing protease inhibitor cocktail (Roche, USA, Indianapolis, IN)  
846 and Benzonase. After the cells were lysed using a French press (Aminco, Urbana, IL) and  
847 centrifuged, the pellet containing the inclusion body proteins was resuspended and washed with  
848 buffer B (buffer A + 0.5% Triton X-100). Then, the inclusion bodies were solubilized in buffer C  
849 (Buffer A + 8 M urea) by incubating/stirring at 4 °C overnight, followed by centrifugation and  
850 clarification. The supernatant containing the denaturing protein was loaded on HisTrap column  
851 (AKTA-prime; GE Healthcare) followed by washing with buffer C. The rRBD was refolded on  
852 HisTrap column using a linear gradient of 8 to 0 M urea containing buffer D (20 mM Tris-HCl, 500  
853 mM NaCl, 5 mM imidazole, 1 mM GSH, 0.1 mM GSSG, 20% glycerol, pH 7.9). Finally, the column  
854 was washed with buffer E (20 mM Tris-HCl, 500 mM NaCl, 100 mM imidazole, 20% glycerol, 5%  
855 glucose, pH 7.9), and the refolded rRBD was eluted with buffer F (20 mM Tris-HCl, 500 mM NaCl,  
856 800 mM imidazole, 20% glycerol, 5% glucose, pH 7.9) and dialyzed to remove imidazole. The  
857 proteins were then quantified, aliquoted, and stored at -80°C until use.

## 858 **Western blot analysis**

859 After treatment with multiple freeze-thaw cycles and Benzonase, phage particles were boiled in  
860 SDS loading buffer for 10 min, separated by 4-20% SDS-PAGE, and transferred to nitrocellulose  
861 membrane PVDF (Bio-Rad). The PVDF was then blocked with 5% bovine serum albumin (BSA)-  
862 PBS (pH 7.4) buffer at RT for 1 hr with gentle shaking. Anti-NP or anti-RBD primary antibodies  
863 were added to the blots and incubated overnight at 4°C in PBS-5% BSA, followed by five times  
864 rinsing in PBST buffer [1xPBS (pH 7.4) and 0.05% Tween 20]. Goat-anti-mouse or goat-anti-  
865 rabbit HRP-conjugated antibody (Thermo Fisher) was applied at a 1:5000 dilution in 5% BSA-  
866 PBST for 1 hr at RT with gentle shaking. After rinsing five times in PBST, binding was visualized  
867 with an enhanced chemiluminescence substrate (Bio-Rad) using the Bio-Rad Gel Doc XR+  
868 System and Image Lab software according to the manufacturer's instructions (Bio-Rad).

## 869 **Cell culture and transfection**

870 HEK293T cells were maintained in Dulbecco's modified Eagle's medium (DMEM; Gibco)  
871 supplemented with 1% antibiotics (Thermo Fisher), 1x HEPES (Thermo Fisher), and 10% fetal  
872 bovine serum (Thermo Fisher). Cells were passaged with 0.25% (w/v) trypsin/0.53 mM EDTA at  
873 a sub-cultivation ratio of 1:5 at 80 to 90% confluence. Cultures were incubated in a humidified  
874 atmosphere at 37°C and 5% CO<sub>2</sub>. The recombinant plasmid containing human ACE2 gene  
875 (Addgene #1786) was transfected into HEK293T cells using Lipofectamine 2000 Transfection  
876 Reagent (Thermo Fisher) according to the manufacturer's instructions. Two days after ACE2  
877 plasmid transfection, the cells were used for RBD or phage binding assay.

## 878 **Inhibition by mice sera of RBD binding to cell surface ACE2**

879 Human ACE2 transfected HEK293T cells were washed with PBS twice and then fixed with 4%  
880 formaldehyde for 15 min at RT. After rinsing twice in PBS for 5 min each, cells were blocked in  
881 blocking buffer (5% BSA-PBS) for 1 hr at RT. Recombinant SARS-CoV-2 RBD protein (Sino  
882 Biological) was added to the cells to a final concentration of 0.2  $\mu$ g/ml in the presence or absence  
883 of the sera with a series of dilutions. The unbound RBD was removed by washing cells five times  
884 with PBST (PBS + 0.1% Tween 20) for 5 min each. The 1/1000 diluted human anti-RBD  
885 monoclonal antibody (Thermo Fisher) was added to cells and incubated in a humidified chamber  
886 for 1 hr at RT or overnight at 4°C. After rinsing five times in PBST for 5 min each, Alexa488- or

887 Rhodamine-conjugated goat anti-human secondary antibody was added (1/500 dilution) (Thermo  
888 Fisher), and incubated for 2~3 hr at room temperature in the dark. The cells were then rinsed five  
889 times in PBST for 5 min each and counter-stained with 1 µg/ml Hoechst 33342 (Thermo Fisher)  
890 for 5 min. The fluorescent signals were recorded by fluorescence microscopy (Carl Zeiss).

### 891 **Binding of T4-S trimer-GFP phages to cell surface ACE2**

892 Soc-GFP protein was produced as described previously<sup>27</sup>. *In vitro* display of Soc-GFP on the T4-  
893 SpyCatcher or T4-S trimer phage was assessed by the co-sedimentation and SDS-PAGE, similar  
894 to the procedures of S-trimers displayed on T4 phage. The T4-SpyCatcher-GFP or T4-S trimer-  
895 GFP phages were resuspended in Opti-MEM medium (Thermo Fisher) and then added to ACE2-  
896 transfected HEK293T cells. After 6 hr incubation, the unbound phages were removed by rinsing  
897 three times in PBS for 5 min each. The GFP fluorescence was recorded by fluorescence  
898 microscopy (Carl Zeiss).

### 899 **Mouse immunizations**

900 We followed the recommendations of the National Institutes of Health about mouse study (*the*  
901 *Guide for the Care and Use of Laboratory Animals*). All mouse experiments were approved by  
902 the Institutional Animal Care and Use Committee of the Catholic University of America  
903 (Washington, DC) (Office of Laboratory Animal Welfare assurance number A4431-01) and the  
904 University of Texas Medical Branch (Galveston, TX) (Office of Laboratory Animal Welfare  
905 assurance number A3314-01). The SARS-CoV-2 virus challenge study was conducted in the  
906 animal biosafety level 3 (ABSL3) suite.

907 Six- to eight-week-old female BALB/c mice (The Jackson Laboratory) were randomly grouped  
908 (5 mice per group) and allowed to acclimate for 14 days. The phage vaccine candidates were  
909 administered by intramuscular (i.m.) injections into their hind legs. A total of  $6 \times 10^{11}$  phages  
910 carrying approximately 20 µg of SARS-CoV-2 antigen(s) were injected on days 0 (prime), 21  
911 (boost 1), and 42 (boost 2). Negative control mice received the same volume of PBS buffer (Naive)  
912 or the same amount of T4 control phage. A group of mice immunized with purified S trimer (20  
913 µg) adjuvanted with Alhydrogel was included as the positive control. Blood was drawn from each  
914 animal on days 0 (pre-bleed), 14, 35, and 56, and the isolated sera were stored at -80°C.

### 915 **Rabbit immunizations**

916 All experiments were performed at Envigo/Cocalico Biologicals (Reamstown, PA) in accordance  
917 with institutional guidelines. Adult New Zealand White rabbits were immunized intramuscularly in  
918 the flank region with  $3 \times 10^{11}$  PFU T4 phages/dose in 0.2 mL saline (n = 4 for group). Pre-immune  
919 test-bleeds were first obtained via venipuncture of the marginal vein of the ear on Day 1. Animals  
920 were immunized on Days 1, and 15 (Prime + One-boost regimen). Immune sera were obtained  
921 on Day 25.

### 922 **ELISA determination of IgG and IgG subtype antibodies**

923 ELISA plates (Evergreen Scientific) were coated with 100 µl per well of 1 µg/ml of SARS-CoV-2  
924 S-ecto protein (Sino Biological), SARS-CoV-2 RBD-untagged protein (Sino Biological), SARS-  
925 CoV-2 NP protein (Sino Biological), or SARS-CoV-2 E protein (1-75 aa) (Thermo Fisher) in  
926 coating buffer [0.05 M sodium carbonate–sodium bicarbonate (pH 9.6)]. After overnight incubation  
927 at 4°C, the plates were washed twice with PBS buffer and blocked for 2 hr at 37°C with 200 µl per  
928 well PBS–5% BSA buffer. Serum samples were diluted with a 5-fold dilution series beginning with  
929 an initial 100-fold dilution in PBS–1% BSA. One hundred microliters of diluted serum samples  
930 were added to each well and the plates were incubated at 37°C for 1 hr. After washing five times  
931 with PBST (PBS + 0.05% Tween-20), the secondary antibody was added at 1:10,000 dilution in

932 PBS–1% BSA buffer (100 µl per well) using either goat-anti-mouse IgG-HRP, goat-anti-mouse  
933 IgG1-HRP, goat-anti-mouse IgG2a-HRP (Thermo Fisher), or goat-anti-rabbit IgG-HRP (Abcam).  
934 After incubation for 1 hr at 37°C and five washes with PBS-T buffer, plates were developed using  
935 the TMB (3,3',5,5'-tetramethylbenzidine) Microwell Peroxidase Substrate System (KPL). After 5-  
936 10 min, the enzymatic reaction was stopped by adding TMB BlueSTOP (KPL) solution. The  
937 absorbance was read within 30 min at 650 nm on a VersaMax spectrophotometer. The endpoint  
938 titer was defined as the highest reciprocal dilution of serum that gives an absorbance more than  
939 2-fold of the mean background of the assay.

#### 940 **Binding of T4 displayed RBD or S-trimer to human ACE2 protein.**

941 An ELISA to analyze the binding of RBD, S-ecto-6P-spytag trimer, T4 displayed RBD/S-trimer to  
942 human ACE2 protein was performed as described above. Briefly, 100 ng protein or  $1 \times 10^{10}$  phages  
943 were coated on plates overnight at 4°C. After blocking with PBS–5% BSA buffer, recombinant  
944 human ACE2-mouse Fc protein (Sino Biological) with a series of dilution was added and  
945 incubated for 1 hr at 37°C. Plates were then incubated with the secondary goat-anti-mouse IgG-  
946 HRP antibody and developed with TMB substrate. Reactions were stopped and the absorbance  
947 was measured at 650 nm on a VersaMax spectrophotometer.

#### 948 **Virus Neutralization assay using BSL-3 live SARS-CoV-2**

949 Neutralizing antibody titers in mouse immune sera were quantified by Vero E6 cell-based micro-  
950 neutralization assay using SARS-CoV-2\_US-WA-1/2020 strain as previously described<sup>46</sup>. Briefly,  
951 serially 1:3 downward diluted mouse sera that were decompemented at 56°C for 60 min in 60 µl  
952 volume were incubated for 1 h at room temperature in duplicate wells of 96-well microtiter plates  
953 that contained 120 infectious SARS-CoV-2 virus in 60 µl in each well. After incubation under BSL-  
954 3 conditions, 100 µl of the mixtures in individual wells were transferred to Vero E6 cell monolayer  
955 grown in 96-well microtiter plates that containing 100 µl of MEM/2%FCS medium in each well and  
956 were cultured for 72 h at 37°C before assessing the presence or absence of cytopathic effect  
957 (CPE). Neutralizing antibody titers of the tested specimens were calculated as the reciprocal of  
958 the highest dilution of sera that completely inhibited virus-induced CPE in at least 50% of the wells  
959 and expressed as 50% neutralizing titer (NT<sub>50</sub>).

960 Neutralizing antibody titers in rabbit immune sera were quantified using an automated, liquid-  
961 handler-assisted, high-throughput, microfocus neutralization/high-content imaging methods  
962 developed at ViroVax. Briefly, rabbit sera (paired pre-immune and immune), were first  
963 decompemented at 56°C for 60 min, and were then serially diluted in 384 well plates, in duplicate,  
964 using a BioTek Precision 2000 liquid handler, along with two reference sera. Twenty microliter  
965 aliquots of SARS-CoV-2\_USA-WA1/2020 were added to all test wells and positive control wells  
966 to yield a final MOI of 10 under BSL-3 conditions. Vero (ATCC® CCL-81) cells were maintained  
967 in a high-glucose Dulbecco's modified Eagle's medium (DMEM) supplemented with 10% fetal  
968 bovine serum (FBS; HyClone Laboratories, South Logan, UT) and 1% penicillin/streptomycin at  
969 37°C with 5% CO<sub>2</sub>. After preincubating the plates for 1 hr, 20 µl of Vero cells ( $10^6$ /ml), containing  
970 50 µg/mL of propidium iodide (PI), was added to all wells using the liquid handler. Plates were  
971 then loaded in an IncuCyte S3 high-content imaging system (Essen Bioscience/Sartorius, Ann  
972 Arbor, MI). Longitudinal image acquisition and processing for virus-induced cytopathic effect (CPE)  
973 and cell death (PI uptake) were performed every six hrs, until cell death profiles had crested and  
974 stabilized (3.5 days). Neutralizing antibody titers (expressed as IC<sub>50</sub> or IC<sub>90</sub>) were obtained from  
975 four-parameter logistic curve-fits of cell death profiles using OriginPro 9 (Origin Lab Corp.,  
976 Northampton, MA).

#### 977 **Challenge of the mice with mouse-adapted live BSL-3 SARS-CoV-2 virus**

978 Immunized mice were challenged with the mouse-adapted (MA) SARS-CoV-2/MA10 strain<sup>47</sup>, a  
 979 generous gift from Ralph Baric at UNC, by the intranasal route as previously described<sup>54</sup>. Briefly,  
 980 mice were inoculated with 60  $\mu$ l of SARS-CoV2-MA10 at a dose of  $\sim 10^5$  TCID<sub>50</sub>. The animals  
 981 were weighed every day over the indicated period of time for monitoring the onset of morbidity  
 982 (weight loss and other signs of illness) and mortality, as the endpoints for evaluating the vaccine  
 983 efficacy.

## 984 Statistics

985 All the data were presented as means  $\pm$  SEM except where indicated. Statistical analyses were  
 986 performed by Graph Pad Prism 9.0 software using one-way or two-way Analysis of variance  
 987 (ANOVA) according to the data. Tukey's multiple comparisons post-test was used to compare  
 988 individual groups. Significant differences between two groups were indicated by \*P < 0.05, \*\*P <  
 989 0.01, \*\*\*P < 0.001, and \*\*\*\*P < 0.0001. ns, no significance. P-values of < 0.05 were considered  
 990 significant.

991

992 **Supplementary Table.** Cpf1 spacer information used in this study.

| Spacers          | Sequence (5'-3')     | GC, % |                                                             |
|------------------|----------------------|-------|-------------------------------------------------------------|
| Cpf1-39-56-sp1   | gttgattaatcagcatcag  | 40    | 39-56 11 Kbp deletion                                       |
| Cpf1-39-56-sp2   | cgccctgaagttcctctg   | 55    |                                                             |
| Cpf1-FarP7K-sp1  | tccactccaagatgctccat | 50    | FarP 7 Kbp deletion; CAG-CD5-Sfl or CAG-CD5-Secto insertion |
| Cpf1-FarP7K-sp2  | aaaccgtcaagagtttttg  | 35    |                                                             |
| Cpf1-FarP7K-sp3  | aatttagcactcgtggagat | 40    |                                                             |
| Cpf1-FarP7K-sp4  | tcgcccgaatgaatccagtt | 50    |                                                             |
| Cpf1-FarP7K-sp5  | ggaagaatccgttaatcgtc | 45    |                                                             |
| Cpf1-FarP7K-sp6  | ccagtgagtttcacacgaa  | 45    |                                                             |
| Cpf1-FarP18K-sp1 | cactgatgaagaaacggtgt | 45    | FarP 18 Kbp deletion;                                       |
| Cpf1-FarP18K-sp2 | tctactgtaatcatgtccca | 40    |                                                             |
| Cpf1-FarP18K-sp3 | tcgttggtcattatacacc  | 40    |                                                             |
| Cpf1-FarP18K-sp4 | gaattaatcgtgctgataca | 35    |                                                             |
| Cpf1-SegF-sp1:   | ttccttctccaccctgacca | 55    | SegF deletion, CMV-RBD insertion                            |
| Cpf1-SegF-sp2:   | atgcagatattagctcacgt | 40    |                                                             |
| Cpf1-SegF-sp3:   | accatcgtattttataatta | 20    |                                                             |
| Cpf1-Hoc-sp1:    | cagttgatataactcctaaa | 30    | Hoc deletion, Ee or Ec insertion                            |
| Cpf1-Hoc-sp2:    | atcaataaccctgtaggtg  | 45    |                                                             |
| Cpf1-Hoc-sp3:    | gttatgtactaaaaggacct | 35    |                                                             |
| Cpf1-Hoc-sp4:    | gaaactggtatcatctatac | 35    |                                                             |
| Cpf1-Soc-sp1:    | agcagaaattagatggaaat | 30    | Soc deletion                                                |
| Cpf1-Soc-sp2:    | atattaacataaccgaggt  | 35    |                                                             |
| Cpf1-Soc-sp3:    | cagcaatccattcagtagct | 45    |                                                             |
| Cpf1-Soc-sp4:    | tggaaagtaactggttaata | 30    |                                                             |
| Cpf1-Mrh2-sp1:   | ttcattacatgctggaat   | 30    | SpyCatcher or RBD insertion                                 |
| Cpf1-Mrh2-sp2:   | gatattatcatttcacgaca | 30    |                                                             |
| Cpf1-Mrh2-sp3:   | aattcgacttgcttctcacc | 45    |                                                             |
| Cpf1-IPIII-sp1:  | aagtcggaagcctttgtagc | 50    | IPIII deletion;                                             |
| Cpf1-IPIII-sp2:  | tgcttgcaaatcaagacc   | 45    |                                                             |

|                        |                       |    |                                 |
|------------------------|-----------------------|----|---------------------------------|
| <b>Cpf1-IPIII-sp3:</b> | ctgatcggtaggctcactca  | 55 | NP insertion                    |
| <b>Cpf1-IPIII-sp4:</b> | ctacagaagcttcggcaata  | 45 |                                 |
| <b>Cpf1-IPII-sp1:</b>  | cttctaagttcggcatgtct  | 45 | IPII deletion                   |
| <b>Cpf1-IPII-sp2:</b>  | ttacgggtctttatcgggcaa | 45 |                                 |
| <b>Cas9-IPIII-sp1:</b> | atggaaaggtcttgatgcaa  | 40 | IPIII deletion;<br>NP insertion |
| <b>Cas9-IPIII-sp2:</b> | attatcaatgacccatttac  | 30 |                                 |
| <b>Cas9-IPIII-sp3:</b> | ggcctttactacagaagctt  | 45 |                                 |

993

## 994 References

- 995 1. Wu, F. et al. A new coronavirus associated with human respiratory disease in China. *Nature* **579**  
996 265-269 (2020) .
- 997 2. V'Kovski, P., Kratzel, A., Steiner, S., Stalder, H. & Thiel, V. Coronavirus biology and replication:  
998 implications for SARS-CoV-2. *Nat. Rev. Microbiol.* (2020).
- 999 3. Nanotechnology versus coronavirus. *Nat. Nanotechnol.* **15**, 617 (2020).
- 1000 4. Shin, M.D. et al. COVID-19 vaccine development and a potential nanomaterial path forward. *Nat.*  
1001 *Nanotechnol.* **15**, 646-655 (2020).
- 1002 5. Krammer, F. SARS-CoV-2 vaccines in development. *Nature* **586**, 516-527 (2020).
- 1003 6. Su, S., Du, L. & Jiang, S. Learning from the past: development of safe and effective COVID-19  
1004 vaccines. *Nat. Rev. Microbiol.* (2020).
- 1005 7. Corbett, K.S. et al. SARS-CoV-2 mRNA vaccine design enabled by prototype pathogen  
1006 preparedness. *Nature* **586**, 567-571 (2020).
- 1007 8. Yang, J. et al. A vaccine targeting the RBD of the S protein of SARS-CoV-2 induces protective  
1008 immunity. *Nature* **586**, 572-577 (2020).
- 1009 9. Ewer, K.J. et al. T cell and antibody responses induced by a single dose of ChAdOx1 nCoV-19  
1010 (AZD1222) vaccine in a phase 1/2 clinical trial. *Nat. Med.* (2020).
- 1011 10. Tan, T.K. et al. A COVID-19 vaccine candidate using SpyCatcher multimerization of the SARS-CoV-  
1012 2 spike protein receptor-binding domain induces potent neutralising antibody responses. *bioRxiv*  
1013 (2020). <https://doi.org/10.1101/2020.08.31.275701>
- 1014 11. Nanomedicine and the COVID-19 vaccines. *Nat. Nanotechnol.* **15**, 963 (2020).
- 1015 12. Florindo, H.F. et al. Immune-mediated approaches against COVID-19. *Nat. Nanotechnol.* **15**, 630-  
1016 645 (2020).
- 1017 13. Miller, E.S. et al. Bacteriophage T4 genome. *Microbiol. Mol. Biol. Rev.* **67**, 86-156, (2003).
- 1018 14. Yap, M.L. & Rossmann M.G. Structure and function of bacteriophage T4. *Future Microbiol.* **9(12)**,  
1019 1319-1327 (2014).
- 1020 15. Chen, Z. et al. Cryo-EM structure of the bacteriophage T4 isometric head at 3.3-Å resolution and  
1021 its relevance to the assembly of icosahedral viruses. *Proc. Natl. Acad. Sci.* **114**, E8184-E8193 (2017).
- 1022 16. Fokine, A. et al. Molecular architecture of the prolate head of bacteriophage T4. *Proc. Natl. Acad.*  
1023 *Sci.* **101**, 6003-6008 (2004).
- 1024 17. Ishii, T. & Yanagida, M. The two dispensable structural proteins (soc and hoc) of the T4 phage  
1025 capsid; their purification and properties, isolation and characterization of the defective mutants,  
1026 and their binding with the defective heads in vitro. *J. Mol. Biol.* **109**, 487-514 (1977).
- 1027 18. Qin, L., Fokine, A., O'Donnell, E., Rao, V.B. & Rossmann, M.G. Structure of the small outer capsid  
1028 protein, Soc: a clamp for stabilizing capsids of T4-like phages. *J. Mol. Biol.* **395**, 728-741 (2010).
- 1029 19. Fokine, A. et al. Structure of the three N-terminal immunoglobulin domains of the highly  
1030 immunogenic outer capsid protein from a T4-like bacteriophage. *J. Virol.* **85**, 8141-8148 (2011).



- 1031 20. Barr, J.J. et al. Bacteriophage adhering to mucus provide a non-host-derived immunity. *Proc. Natl.*  
1032 *Acad. Sci.* **110**, 10771-10776 (2013).
- 1033 21. Tao, P., Wu, X., Tang, W.C., Zhu, J. & Rao, V. Engineering of Bacteriophage T4 Genome Using  
1034 CRISPR-Cas9. *ACS Synth. Biol.* **6**, 1952-1961 (2017).
- 1035 22. Liu, Y. et al. Covalent modifications of bacteriophage genome confer a degree of resistance to  
1036 bacterial CRISPR systems. *J. Virol.* (2020).
- 1037 23. Fang, Q. et al. Structural morphing in a symmetry-mismatched viral vertex. *Nat. Commun.* **11**,  
1038 1713 (2020).
- 1039 24. Sun, S. et al. The structure of the phage T4 DNA packaging motor suggests a mechanism  
1040 dependent on electrostatic forces. *Cell* **135**, 1251-1262 (2008).
- 1041 25. Li, Q., Shivachandra, S.B., Zhang, Z. & Rao, V.B. Assembly of the small outer capsid protein, Soc,  
1042 on bacteriophage T4: a novel system for high density display of multiple large anthrax toxins and  
1043 foreign proteins on phage capsid. *J. Mol. Biol.* **370**, 1006-1019 (2007).
- 1044 26. Shivachandra, S.B. et al. In vitro binding of anthrax protective antigen on bacteriophage T4 capsid  
1045 surface through Hoc-capsid interactions: a strategy for efficient display of large full-length  
1046 proteins. *Virology* **345**, 190-198 (2006).
- 1047 27. Tao, P. et al. In vitro and in vivo delivery of genes and proteins using the bacteriophage T4 DNA  
1048 packaging machine. *Proc. Natl. Acad. Sci.* **110**, 5846-5851 (2013).
- 1049 28. Zhu, J. et al. A prokaryotic-eukaryotic hybrid viral vector for delivery of large cargos of genes and  
1050 proteins into human cells. *Sci. Adv.* **5**, eaax0064 (2019).
- 1051 29. Tao, P., Zhu, J., Mahalingam, M., Batra, H. & Rao, V.B. Bacteriophage T4 nanoparticles for vaccine  
1052 delivery against infectious diseases. *Adv. Drug. Deliv. Rev.* **145**, 57-72 (2018).
- 1053 30. Alexandra C. Walls, Y.-J.P., M. Alejandra Tortorici, Abigail Wall, Andrew T. McGuire and David  
1054 Veesler Structure, function and antigenicity of the SARS-CoV-2 spike glycoprotein. *Cell* (2020).
- 1055 31. Hsieh, C.L. et al. Structure-based design of prefusion-stabilized SARS-CoV-2 spikes. *Science* **369**,  
1056 1501-1505 (2020).
- 1057 32. Sarkar, M. & Saha, S. Structural insight into the role of novel SARS-CoV-2 E protein: A potential  
1058 target for vaccine development and other therapeutic strategies. *PLoS One* **15**, e0237300 (2020).
- 1059 33. Le Bert, N. et al. SARS-CoV-2-specific T cell immunity in cases of COVID-19 and SARS, and  
1060 uninfected controls. *Nature* **584**, 457-462 (2020).
- 1061 34. Lan, J. et al. Structure of the SARS-CoV-2 spike receptor-binding domain bound to the ACE2  
1062 receptor. *Nature* **581**, 215-220 (2020).
- 1063 35. Kutter, E. et al. From Host to Phage Metabolism: Hot Tales of Phage T4's Takeover of E. coli.  
1064 *Viruses* **10**, 387 (2018).
- 1065 36. Grifoni, A. et al. Targets of T Cell Responses to SARS-CoV-2 Coronavirus in Humans with COVID-19  
1066 Disease and Unexposed Individuals. *Cell* **181**, 1489-1501 e1415 (2020).
- 1067 37. Zeng, W. et al. Biochemical characterization of SARS-CoV-2 nucleocapsid protein. *Biochem.*  
1068 *Biophys. Res. Commun.* **527**, 618-623 (2020).
- 1069 38. Mullaney, J.M. & Black, L.W. Capsid targeting sequence targets foreign proteins into  
1070 bacteriophage T4 and permits proteolytic processing. *J. Mol. Biol.* **261**, 372-385 (1996).
- 1071 39. Keeble, A.H. et al. Approaching infinite affinity through engineering of peptide-protein interaction.  
1072 *Proc. Natl. Acad. Sci.* **116**, 26523-26533 (2019).
- 1073 40. Zuo, X. et al. Expression and purification of SARS coronavirus proteins using SUMO-fusions.  
1074 *Protein Expr. Purif.* **42**, 100-110 (2005).
- 1075 41. Ke, Z. et al. Structures and distributions of SARS-CoV-2 spike proteins on intact virions. *Nature* **588**,  
1076 498-502 (2020).

- 1077 42. Piccoli, L. et al. Mapping Neutralizing and Immunodominant Sites on the SARS-CoV-2 Spike  
1078 Receptor-Binding Domain by Structure-Guided High-Resolution Serology. *Cell* **183**, 1024-1042  
1079 e1021 (2020).
- 1080 43. Robbiani, D.F. et al. Convergent antibody responses to SARS-CoV-2 in convalescent individuals.  
1081 *Nature* **584**, 437-442 (2020).
- 1082 44. Bolles, M. et al. A double-inactivated severe acute respiratory syndrome coronavirus vaccine  
1083 provides incomplete protection in mice and induces increased eosinophilic proinflammatory  
1084 pulmonary response upon challenge. *J. Virol.* **85**, 12201-12215 (2011).
- 1085 45. Jordan, M.B., Mills, D.M., Kappler, J., Marrack, P. & Cambier, J.C. Promotion of B cell immune  
1086 responses via an alum-induced myeloid cell population. *Science* **304**, 1808-1810 (2004).
- 1087 46. Harcourt, J. et al. Isolation and characterization of SARS-CoV-2 from the first US COVID-19 patient.  
1088 *bioRxiv* (2020). <https://doi.org/10.1101/2020.03.02.972935>
- 1089 47. Leist, S.R. et al. A Mouse-Adapted SARS-CoV-2 Induces Acute Lung Injury and Mortality in Standard  
1090 Laboratory Mice. *Cell* **183**, 1070-1085 e1012 (2020).
- 1091 48. Tao, P. et al. A Bacteriophage T4 Nanoparticle-Based Dual Vaccine against Anthrax and Plague.  
1092 *mBio* **9**, e01926-18 (2018).
- 1093 49. Tao, P. et al. Mutated and bacteriophage T4 nanoparticle arrayed F1-V immunogens from *Yersinia*  
1094 *pestis* as next generation plague vaccines. *PLoS Pathog.* **9**, e1003495 (2013).
- 1095 50. Rao, M. et al. Highly effective generic adjuvant systems for orphan or poverty-related vaccines.  
1096 *Vaccine* **29**, 873-877 (2011).
- 1097 51. Kanekiyo, M., Ellis, D. & King, N.P. New Vaccine Design and Delivery Technologies. *J. Infect. Dis.*  
1098 **219**, S88-S96 (2019).
- 1099 52. Walls, A.C. et al. Elicitation of Potent Neutralizing Antibody Responses by Designed Protein  
1100 Nanoparticle Vaccines for SARS-CoV-2. *Cell* **183**, 1367-1382 e1317 (2020).
- 1101 53. Zhao, J.C., Zhao, Z.D., Wang, W. & Gao, X.M. Prokaryotic expression, refolding, and purification of  
1102 fragment 450-650 of the spike protein of SARS-coronavirus. *Protein Expr. Purif.* **39**, 169-174 (2005).
- 1103 54. Wang, Y. et al. Receptor-binding domain of MERS-CoV with optimal immunogen dosage and  
1104 immunization interval protects human transgenic mice from MERS-CoV infection. *Hum. Vaccines*  
1105 *Immunother.* **13**, 1615-1624 (2017).

1106
